1 **Lactational delivery of Triclosan promotes non-alcoholic fatty liver disease in**  
2 **newborn mice**

3

4 André A. Weber<sup>1</sup>, Xiaojing Yang<sup>1</sup>, Elvira Mennillo<sup>1</sup>, Jeffrey Ding<sup>2</sup>, Jeramie D. Watrous<sup>2</sup>,  
5 Mohit Jain<sup>2</sup>, Shujuan Chen<sup>1</sup>, Michael Karin<sup>3</sup>, Robert H. Tukey<sup>1,\*</sup>.

6

7 Short Title: *Triclosan drives neonatal NAFLD*

8

9 <sup>1</sup>Laboratory of Environmental Toxicology, Department of Pharmacology, University of  
10 California, San Diego, La Jolla, CA 92093, USA.

11 <sup>2</sup>Departments of Medicine and Pharmacology, University of California, San Diego, La  
12 Jolla, CA 92093, USA.

13 <sup>3</sup>Laboratory of Gene Regulation and Signal Transduction, Department of Pharmacology,  
14 University of California, San Diego, La Jolla, CA 92093.

15

16 **Correspondence** should be addressed to Robert H. Tukey. [rtukey@health.ucsd.edu](mailto:rtukey@health.ucsd.edu):

17 UC San Diego, 9500 Gilman Drive, La Jolla, CA 92093-0722

18

19 **Conflict of Interest Statement:** The authors disclose no additional conflicts.

20

21

22 **Keywords:** lactation, lipogenesis, endoplasmic reticulum stress, nonalcoholic FLD,  
23 nonalcoholic steatohepatitis, toxicant-associated steatohepatitis.

24

25

## ABBREVIATIONS

26 ACACA, acetyl-CoA carboxylase 1; ACLY, ATP citrate lyase; AMPK, adenosine  
27 monophosphate (AMP)-activated protein kinase; ATF4, Activating transcription Factor  
28 4; CCNE1, cyclin e1; CLDN, Claudin; CTGF, connective tissue growth factor, CYP4A10,  
29 cytochrome P450, family 4, subfamily a, polypeptide 10; CYP4A14, cytochrome P450,  
30 family 4, subfamily a, polypeptide 14; CYP7A1, Cholesterol 7 alpha-hydroxylase; DNL,  
31 de novo lipogenesis; EHHADH, Enoyl-CoA Hydratase and 3-Hydroxyacyl CoA  
32 Dehydrogenase; eIF2 $\alpha$ , eukaryotic translation initiation factor 2 alpha; ER, endoplasmic  
33 reticulum; FABP1, fatty acid binding protein 1; FASN, fatty acid synthase; FGF21,  
34 fibroblast growth factor 21; FL, fatty liver; FLD, fatty liver disease; FOXO1, forkhead box  
35 O1; FXR, farnesoid X receptor; gp130<sup>Act</sup>, active glycoprotein 130; GR, glucocorticoid  
36 receptor; HCC, hepatocellular carcinoma; IB, immunoblotting; IL1 $\beta$ , interleukin 1 beta;  
37 LC-MS, Liquid chromatography mass spectrometry; MCM, mini-chromosome  
38 maintenance; MLXIPL, MLX-interacting protein-like; NAFLD, non-alcoholic FLD; NASH,  
39 non-alcoholic steatohepatitis, NQO-1, NAD(P)H dehydrogenase [quinone] 1; OCA,  
40 obeticholic acid; ORO, oil red O; PERK, PKR-like ER kinase; PPAR $\alpha$ , peroxisome  
41 proliferator-activated receptor alpha, SCD1, stearyl-CoA desaturase-1; SHP, small  
42 heterodimer partner; SREBF1, sterol regulatory element-binding protein 1; TG,  
43 triglyceride; TJP, tight junction protein; TCS, triclosan; UPR, unfolded protein response;  
44 YAP, yes-associated protein-1; WT, wild-type.

45

46

## ABSTRACT

47 Pediatric non-alcoholic fatty liver disease (NAFLD) is escalating in the United States,  
48 with a limited mechanistic understanding. Triclosan (TCS) is a high-volume antimicrobial  
49 additive that has been detected in human breastmilk and shown in adult mice to cause  
50 hepatosteatorosis. To examine the effect of TCS presented to neonatal mice through  
51 lactation, we exposed pregnant females to TCS in their diet and evaluated its impact on  
52 nursing neonates. TCS is efficiently transferred by lactation to newborn mice, causing  
53 significant fatty liver (FL) during the suckling period. Lactational delivery stimulated  
54 hepatosteatorosis, triglyceride accumulation, endoplasmic reticulum (ER) stress,  
55 inflammation, and liver fibrosis. These events were mirrored by inhibition of key  
56 metabolic regulators, FGF21 and AMPK. De novo lipogenesis (DNL) induced by  
57 lactational TCS exposure was blocked in mice deficient in hepatic ATF4 . In primary  
58 hepatocytes, siRNA specific inhibition of PERK, an ATF4 upstream activator and initiator  
59 of ER stress, blocked TCS induced DNL. Also, in the absence of PPAR $\alpha$ , which targets  
60 regulation of ATF4, TCS induced triglyceride accumulation and the induction of DNL was  
61 blocked. The administration of obeticholic acid (OCA), a potent FXR agonist, as well as  
62 activation of intestinal mucosal-regenerative gp130 signaling, led to reduced liver ATF4  
63 expression, PPAR $\alpha$  signaling, and DNL when neonates were exposed to TCS. In  
64 summary, TCS exposure via lactation leads to early indicators of NAFLD development  
65 accompanied by hepatosteatorosis that were mediated in a PERK-eIF2 $\alpha$ -ATF4-PPAR $\alpha$   
66 cascade. These studies indicate that mother to child transmission of environmental  
67 toxicants such as TCS may underlie the recent increases in pediatric NAFLD.

68

69

## INTRODUCTION

70 Nonalcoholic FLD (NAFLD) has emerged as the most common liver disorder  
71 worldwide, paralleling the obesity and diabetes epidemics<sup>1</sup>. The prevalence of NAFLD in  
72 adults in Western countries is estimated between 20-30% and approximately 10-20% of  
73 these cases have a more severe manifestation named non-alcoholic steatohepatitis  
74 (NASH)<sup>2</sup>. Although NASH usually appears in adults, there is an alarming increase in  
75 NAFLD in children, termed pediatric NAFLD<sup>3,4</sup>, which is a prerequisite towards NASH  
76 development. Epidemiological studies have shown a prevalence of pediatric NAFLD in  
77 up to 10% of the pediatric population<sup>5</sup>. NAFLD in children displays the same  
78 morphological lesions observed in adults, however, the distribution of these lesions is  
79 frequently different. For example, in adult's, steatosis starts in the perivenular zone, while  
80 in children steatosis starts in the periportal zone<sup>6</sup>. The progression of simple steatosis to  
81 NASH depends on multiple parallel hits, including endoplasmic reticulum (ER) stress,  
82 inflammation, defective lipid export, enhanced de novo lipogenesis (DNL) and  
83 deterioration of the intestinal barrier<sup>7-10</sup>.

84 Physiological changes and different pathological conditions can activate an  
85 elaborate signaling pathway called integrated stress response (ISR). Extrinsic (hypoxia,  
86 amino acid deprivation and viral infection) and intrinsic (ER) stresses can activate ISR.  
87 ER stress, which plays an important role in fatty liver disease (FLD), activates the  
88 activating transcription factor 4 (ATF4) through protein kinase R like kinase (PERK)<sup>11</sup>.  
89 Peroxisome proliferator-activated receptor  $\alpha$  (PPAR $\alpha$ ) is also a key regulator of hepatic  
90 fatty acid oxidation (FAO) and lipid metabolism<sup>12</sup>. However, the involvement of PPAR $\alpha$   
91 in the progression of FLD is controversial<sup>13,14</sup>. Moreover, PPAR $\alpha$  has a strong link to ER  
92 stress signaling. *Atf4*-null mice challenged with a high fructose diet have exhibited  
93 diminished lipogenesis and PPAR $\alpha$  target gene expression<sup>15</sup>. PPAR $\alpha$  also has a strong  
94 link with ATF6, another ER sensor. Overexpression of ATF6 in NAFLD livers leads to  
95 activation of the ATF6-PPAR $\alpha$  axis, promoting an increase in hepatic FAO genes

96 including fibroblast growth factor 21 (*Fgf21*), a liver-secreted cytokine that regulates  
97 hepatic metabolic processes, including fat oxidation, gluconeogenesis, and metabolic  
98 gene expression<sup>16</sup>. FGF21 has been shown to ameliorate NAFLD<sup>17</sup>.

99 Environmental toxicants in the absence of caloric overload can induce FLD or  
100 toxicant associated FLD (TAFLD)<sup>18,19</sup>. Triclosan (TCS) is a high-volume chemical used  
101 as an antimicrobial additive in many human consumer products<sup>20,21</sup>. We have  
102 demonstrated that long term TCS exposure in adult mice increased liver-to-body weight  
103 (BW) without affecting BW<sup>22</sup>. This resulted in enhanced liver proliferation along with  
104 induction of genes linked to fibrogenesis, elevated collagen accumulation, and liver  
105 oxidative stress, supporting the notion that TCS may lead to a condition similar to NASH,  
106 referred to as toxicant associated steatohepatitis (TASH). We have recently confirmed  
107 that TCS induces FLD while blunting HFD-induced expression of FGF21<sup>23</sup>.

108 TCS is a ubiquitous environmental toxicant<sup>21</sup> and has been identified in human  
109 breastmilk samples with concentrations up to 2,100 µg/kg of lipids<sup>24,25</sup>. Based upon the  
110 volume of breastmilk that an infant consumes per day it has been estimated that a  
111 breastfeeding infant can consume 1000-2000 ng of TCS daily<sup>24,26</sup>. In addition, while  
112 breastmilk has an important influence on infant survival and health reducing disease risk  
113 and promoting aspects of postnatal development<sup>27</sup>, environmental toxicants can still be  
114 transferred from the nurturing mother to newborns through lactation<sup>28</sup>. The constant  
115 presence of TCS in breastmilk in different studies and the high incidence of pediatric  
116 NAFLD led us to hypothesize that the transfer of TCS from lactating mothers to newborns  
117 can lead to NAFLD in children. To examine the effect of TCS presented to neonatal mice  
118 through lactation, we exposed pregnant females to TCS in their diet and evaluated the  
119 delivery of TCS through breastmilk. Our findings have confirmed that the delivery of TCS  
120 through lactation leads to the precocious development of fatty liver suggesting that  
121 exposure of newborns to TCS and other toxicants through lactation maybe a contributing  
122 factor to early onset NAFLD and NASH.

## 123 RESULTS

### 124 TCS stimulates hepatic ER stress and DNL in mice

125 Mating C57/BL6 mice were placed on a normal chow diet containing 0.012% TCS  
126 that was continued after birth with neonates exposed through this route for 21 days. TCS  
127 in milk and serum of breastfed neonates was measured by LC-MS/MS analysis. The  
128 concentration of TCS in breastmilk isolated from the stomach of neonates was  $81 \pm 19.5$   
129  $\mu\text{g}/\text{kg}$  at day 14, while the serum concentration at 21 days of exposure was  $52.8 \pm 8.5$   
130  $\mu\text{g}/\text{kg}$  (Fig. 1a). These concentrations were like those reported in milk and serum from  
131 human samples<sup>25,29</sup>. Breastfeeding with TCS has no effect on body weight and liver  
132 weight (Supplementary Fig. S1a).

133 Neonatal exposure to TCS through breastmilk resulted in upregulation of ER  
134 stress in liver, reflected by induction of the genes glucose-regulated protein 78 (*Grp78*),  
135 ER degradation enhancing alpha-mannosidase like protein 1 (*Edem1*), spliced X-box  
136 binding protein-1 (*Xbp1s*) and C/EBP homologous protein (*Chop*), with increases in  
137 activated phosphorylated eukaryotic translation initiation factor 2 $\alpha$  (p-eIF2 $\alpha$ ) and  
138 activating transcription factor 4 (ATF4) (Fig. 1b). Examination of the hepatic gene profile  
139 indicated that neonatal mice breastfed with TCS exhibited increased expression of genes  
140 that participate in DNL, including sterol regulatory element-binding protein 1 (*Srebf1*),  
141 carbohydrate-responsive element-binding protein (ChREBP, encoded by *Mlxip1*), ATP  
142 citrate lyase (*Acly*), acetyl-CoA carboxylase (*Acaca*), fatty acid synthase (*Fasn*) and  
143 stearoyl-CoA desaturase-1 (*Scd1*) (Fig. 1c). However, there were no statistical  
144 differences between vehicle and TCS in expression of fatty acid  $\beta$ -oxidation genes,  
145 including peroxisomal acyl-coenzyme A oxidase 1 (*Acox1*) and carnitine palmitoyl  
146 transferase I (*Cpt1a*) (Supplementary Fig. 1b). Through immunoblot analysis (IB), FASN,  
147 which is a key enzyme in DNL<sup>30</sup>, was also increased in livers of TCS breastfed mice (Fig.  
148 1c). Furthermore, the increase in serum alanine aminotransferase (ALT) in TCS exposed  
149 mice is an indication that the liver has been damaged (Fig. 1d). By LC-MS/MS, palmitate

150 in serum of neonates was two-fold higher than in control-fed neonatal mice (Fig. 1e).  
151 Congruently, liver and serum triglycerides (TG) were elevated in neonatal mice exposed  
152 to TCS (Fig. 1e). Oil Red O (ORO) staining showed accumulation of lipid droplets in the  
153 cytoplasm of hepatocytes from TCS treated neonatal mice (Fig. 1f). However, Ki-67  
154 staining and TUNEL assay revealed no effects of TCS on proliferation and cell death,  
155 respectively (Supplementary Fig. S1c and d).

156

### 157 **TCS stimulates ER stress, DNL and PPAR $\alpha$ in primary hepatocytes**

158 To investigate the effects of TCS in vitro, we treated primary hepatocytes with  
159 TCS at 30  $\mu$ M for 72 hours. After treatment, TCS was shown to upregulate genes driving  
160 DNL including *Fasn*, *Acaca*, *Mlxipl*, *Acly* and *Srebf1* (Fig. 2a), in addition to PPAR $\alpha$  target  
161 genes (*Cyp4a10* and *Cyp4a14*) (Fig. 2b). Significant induction was also observed with  
162 genes associated with ER stress (*Grp78*, *Xbp1s* and *Chop*) (Fig. 2c). These findings  
163 suggest that a strong correlation exists between TCS exposure and ER stress. Induction  
164 of genes linked to ER stress in vivo and in vitro led us to speculate that ER stress may  
165 be linked to PERK activation followed by ATF4 activation. To examine this possibility, we  
166 first treated primary hepatocytes with PERK specific siRNA. Q-RT-PCR analysis  
167 confirmed downregulation of *Perk* gene expression (Fig. 2d). In the absence of PERK  
168 specific siRNA, ATF4 was induced by TCS, as shown by IB analysis. However, in the  
169 presence of PERK specific siRNA, TCS treatment did not induce ATF4 (Fig. 2e). These  
170 findings indicate that PERK activation and induction of ATF4 underlie the processes  
171 leading to ER stress and induction of DNL.

172

### 173 **TCS induces NAFLD and HCC-related genes**

174 Utilizing RNA-seq analysis to investigate those pathways in neonate liver  
175 impacted by lactational TCS delivery, results showed that TCS exposure was associated  
176 with alterations in more than 410 upregulated genes and 532 downregulated genes, with

177 an adjusted  $P$  value less than 0.05 (Supplementary Fig. S2). Gene ontology profiles  
178 revealed that TCS robustly induced genes linked to lipogenesis, fatty acid uptake,  
179 cholesterol biosynthesis and acylglycerol metabolism. Another set of genes increased  
180 by TCS treatment are the major urinary protein (*Mup*) genes, including, *Mup17*, *Mup19*,  
181 *Mup15*, *Mup9* and *Mup3* (Fig. 3a). TCS exposure also increased genes associated with  
182 retinol metabolism, including cytochrome P450 26A1 (*Cyp26a1*),  
183 dehydrogenase/reductase SDR family member 4 (*Dhrs4*) and 9 (*Dhrs9*), aldehyde  
184 dehydrogenase family 1, subfamily A7 (*Aldh1a7*) and patatin-like phospholipase domain-  
185 containing protein 3 (*Pnpla3*) (Fig. 3a), which has an important role in NAFLD disease  
186 progression<sup>31</sup>.

187 Previous results in our laboratory have demonstrated that long-term TCS  
188 exposure can promote hepatocellular carcinoma (HCC)<sup>22</sup>. RNA-seq analysis  
189 demonstrated that mini-chromosome maintenance (*Mcm*) genes are upregulated in TCS  
190 treated mice, which have been reported in several types of cancer, including HCC<sup>32</sup>.  
191 Examination of the MCM genes indicated that TCS exhibited an increase in MCM -2, -4,  
192 -5, -6, -7, -8 and -10. Several other genes related to HFD-induced HCC<sup>33</sup> that were  
193 statistically upregulated by TCS exposure included Golgi membrane protein 1 (*Golm1*),  
194 integrin alpha-6 (*Itga6*) and ephrin A1 (*Efna1*) (Fig. 3a). However, many of genes linked  
195 to the onset of HCC related genes were not statistically regulated by TCS treatment  
196 (Supplementary Fig. S3).

197 Progression from NAFLD to NASH is accompanied by fibrosis, inflammation, and  
198 oxidative stress<sup>7,8,23,31</sup>. In the present study, fibrogenic, oxidative stress, and  
199 inflammatory marker genes were upregulated in TCS exposed neonatal mice (Fig. 3b).  
200 The increase in CYP7A1, NQO-1, SCD1 and IL-1 $\beta$  were confirmed by IB analysis (Fig.  
201 3c). Sirius red staining and F4/80 immunohistochemistry showed increases in fibrosis  
202 and inflammation in TCS treated neonatal mice (Fig. 3d). A semi-quantitative  
203 assessment score according to inflammation, fibrosis, steatosis, and cell death in liver



204 indicates a score of 3 in TCS breastfed mice and 0 for neonatal mice breastfed in the  
205 absence of TCS exposure (Supplementary Table S1).

206

### 207 **TCS blocks hepatic glucocorticoid response**

208 TCS exposure abrogated the response to glucocorticoids in the liver.  
209 Glucocorticoids activate the glucocorticoid receptor (GR) and regulate important  
210 metabolic pathways in the liver, including gluconeogenesis<sup>34</sup>, adenosine  
211 monophosphate (AMP)-activated protein kinase (AMPK)<sup>35</sup> and the urea cycle<sup>36</sup>. RNA-  
212 seq analysis demonstrated that genes related to gluconeogenesis and the urea cycle  
213 were significantly downregulated in livers of TCS breastfed mice. Furthermore, gene and  
214 protein analysis showed a decrease in expression of forkhead box O1 (*Foxo1*), an  
215 important transcription factor involved in gluconeogenesis<sup>37</sup> (Supplementary Fig. S4a-d).

216 We have previously confirmed that TCS disrupted FGF21 expression<sup>23</sup>. GR can  
217 control AMPK target genes via FGF21<sup>35</sup>. Q-RT-PCR and ELISA analysis revealed  
218 downregulation of FGF21, in both liver and serum of TCS exposed neonatal mice (Fig.  
219 4a). Surprisingly, IB analysis showed decreased levels of phosphorylated AMPK in TCS  
220 exposed mice. From RNA-seq analysis, AMPK target genes including peroxisome  
221 proliferator-activated receptor  $\gamma$  coactivator 1 $\alpha$  (*Ppargc1a*), mitochondrial fission factor  
222 (*Mff*), unc-51 like autophagy activating kinase 1 (*Ulk1*) and glycogen Synthase 2 (*Gys2*)  
223 were also downregulated (Fig. 4b). Other hepatokines including fetuin B (*Fetub*), retinol  
224 binding protein 4 (*Rbp4*), fetuin A (*Ahsg*), selenoprotein P (*Selenop*) and  
225 growth/differentiation factor 15 (*Gdf15*) (Supplementary Fig. S4e) were downregulated  
226 following TCS exposure.

227

### 228 **ATF4 controls DNL in TCS exposed mice**

229 Q-RT-PCR and IB analysis confirmed the absence of ATF4 in the liver of *Atf4* <sup>$\Delta$ Hep</sup>  
230 mice (Supplementary Fig. S5a). When we examined expression of genes linked to DNL

231 in *Atf4<sup>F/F</sup>* and *Atf4<sup>ΔHep</sup>* mice exposed to lactational TCS, Q-RT-PCR analysis showed that  
232 induction of *Srebf1*, *Mlxipl*, *Acaca* and *Fasn* genes, all associated with the development  
233 of DNL, were abrogated in *Atf4<sup>ΔHep</sup>* neonatal mice exposed to TCS (Fig. 5a). Consistent  
234 with these results, TCS exposed *Atf4<sup>ΔHep</sup>* mice had less TG in their livers compared to  
235 *Atf4<sup>F/F</sup>* mice (Fig. 5b). *Atf4<sup>ΔHep</sup>* mice also expressed less FASN (Fig. 5c) and showed  
236 reduced TCS-induced lipid accumulation (Fig. 5d).

237 ATF4 interacts with many transcription factors<sup>11</sup>. To analyze a possible link  
238 between ATF4 and PPARα, we examined PPARα target genes in *Atf4<sup>F/F</sup>* and *Atf4<sup>ΔHep</sup>*  
239 mice treated with TCS. Q-RT-PCR analysis showed decreased expression of *Cyp4a10*  
240 and *Cyp4a14* in *Atf4<sup>ΔHep</sup>* mice relative to *Atf4<sup>F/F</sup>* mice (Supplementary Fig. S5b).  
241 Furthermore, blockage of PERK in primary hepatocytes with PERK siRNA followed by  
242 TCS treatment demonstrated that when the PERK-ATF4 axis is blocked, PPARα target  
243 genes (*Cyp4a10*, *Cyp4a14* and *Fabp1*) and several genes associated with DNL (*Srebf1*,  
244 *Fasn*, *Acaca* and *Mlxipl*) are downregulated (Fig. 5e). These findings indicate that  
245 PPARα acts downstream of ATF4 to control DNL.

246

#### 247 **PPARα controls DNL in TCS treated mice**

248 Liver tissues from NASH patients exhibit induction of PPARα and its downstream  
249 target genes<sup>33</sup>. RNA-seq analysis confirmed that PPARα signaling was activated in livers  
250 of TCS exposed neonatal mice (Supplementary Fig. S6). Examining PPARα target gene  
251 expression by Q-RT-PCR we found robust upregulation of downstream genes, including  
252 *Cyp4a14*, *Ehhadh* and *Cyp4a10* (Fig. 6a). Induction of hepatic *Cyp4a14* by PPARα has  
253 been linked to FLD<sup>15</sup>.

254 In addition, PPARα activation by TCS upregulated genes linked to DNL, such as  
255 *Mlxipl*, *Acly*, *Acaca*, *Fasn*, *Srebf1* and *Scd1*, whose induction by TCS was blocked in  
256 *Ppara<sup>-/-</sup>* mice (Fig. 6b). IB analysis confirmed reduced expression of FASN and SCD1  
257 proteins in livers of *Ppara<sup>-/-</sup>* mice exposed to TCS (Fig. 6c). ELISA showed reduced

258 accumulation of TG in TCS exposed *Ppara*<sup>-/-</sup> livers (Fig. 6d). Histological analysis of  
259 *Ppara*<sup>-/-</sup> mice exposed to TCS was comparable with that of *Atf4*<sup>ΔHep</sup> mice in which  
260 hepatosteatosis was blocked (Fig. 6e). Combined, these results indicate that PPARα is  
261 required for induction of hepatosteatosis in TCS exposed neonatal mice.

262

### 263 **Obeticholic acid (OCA) blocks TCS induced DNL**

264 Lactational delivery of TCS to neonatal mice resulted in reduced expression of  
265 hepatic FXR target genes (Supplemental Fig. S7a). FXR agonists, including OCA, were  
266 developed as potential therapeutics for NAFLD and NASH<sup>38-40</sup>. Neonatal mice nursing  
267 on normal milk or TCS tainted breastmilk were treated daily from postnatal day 16 to 20  
268 with oral OCA (100 mg/kg) and tissues collected on postnatal day 21. OCA treatment  
269 resulted in robust induction of *Shp*, an FXR target gene in liver and small intestine (Fig.  
270 7a and Supplemental Fig. S7b). FXR activation was reported to enhance expression of  
271 intestinal barrier genes, such as claudins and tight-junction proteins (TJPs)<sup>45</sup>. However,  
272 our results revealed few changes in intestinal tissue of TCS exposed neonates treated  
273 with OCA, other than decreased *Tjp1*, *Cldn1* and *Cldn19* mRNAs (Supplemental Fig.  
274 S7c).

275 OCA administration had a significant impact on liver. Q-RT-PCR analysis  
276 demonstrated that OCA reduced expression of genes driving DNL including *Mlxipl*,  
277 *Acaca*, *Fasn* and *Scd1* (Fig. 7b). OCA also repressed PPARα target genes, including  
278 *Cyp4a10*, *Cyp4a14* and *Fabp1*, but only when mice were exposed to TCS (Fig. 7c). The  
279 treatment with OCA increases *Fgf21* gene expression even when mice are exposed to  
280 TCS (Fig. 7d). ELISA showed reduced hepatic accumulation of TG in mice treated with  
281 OCA along with TCS (Fig. 7e). OCA administration along with TCS decreases *Grp78*  
282 and *Xbp1s* (Fig. 7f), while IB analysis showed reduced ATF4 and FASN proteins in OCA  
283 treated neonatal mice exposed to TCS (Fig. 7g). Importantly, ORO staining revealed a  
284 decrease in lipid accumulation in mice treated with OCA along with TCS (Fig. 7h).

285 OCA administration also had an impact on the GR and AMPK response. Q-RT-  
286 PCR analysis demonstrated that OCA increased expression of metallothionein 2 (*Mt2*)  
287 and Sulfotransferase Family 1E Member 1 (*Sult1e1*), important GR target genes, only in  
288 the absence of TCS. We can conclude that OCA does not stimulate GR targets in the  
289 presence of TCS. However, *Ppargc1a*, a key AMPK target gene, plays an important role  
290 in FAO and helps to limit lipid accumulation in the liver<sup>41</sup>. While the *Ppargc1a* gene is  
291 downregulated by TCS (Fig. 4), OCA overrides this repression by showing considerable  
292 induction in the presence of TCS (Supplemental Fig. S7 d), an event that may contribute  
293 towards protecting the liver from TCS induced FLD.

294

### 295 **Gp130 signaling blocks TCS-induced DNL**

296 An increase in intestinal barrier permeability is one of the factors underlying the  
297 progression of NAFLD<sup>10</sup>. TCS treatment damaged the intestinal barrier, as demonstrated  
298 by accelerated apoptosis with increases in cytochrome C and induction of caspase-9  
299 and caspase-3 (Fig. 8a). Apoptosis was mirrored by downregulation of claudin mRNAs  
300 (*Cldn1* and *Cldn19*) (Fig. 8b). Moreover, the upregulation of several antimicrobial  
301 proteins (AMPs), regenerating islet-derived protein 3 beta and gamma (*Reg3b* and  
302 *Reg3g*) and resistin-like beta (*Retnlb*), suggested that TCS is causing stress or microbial  
303 translocation in the intestinal mucosa (Supplemental Fig. S8a). Furthermore, TCS  
304 administration dramatically increased phosphorylated total  $\beta$ -catenin and its targets  
305 LGR5 and SGK1 (Supplemental Fig. S8b).  $\beta$ -catenin is known to promote tumorigenesis  
306 via the *Wnt* pathway<sup>42</sup>. However, histological analysis did not present any tumor  
307 formation (Supplemental Fig. S8c). With induction of intestinal AMPs, TCS  
308 administration is causing significant stress without altering the majority of the claudins  
309 and TJPs mRNAs (Supplemental Fig. S8 d,e).

310 Intestinal damage activates yes-associated protein-1 (YAP) and tafazzin (TAZ)  
311 to stimulate barrier repair<sup>43</sup>. Indeed, TCS exposure upregulated YAP target genes,

312 including connective tissue growth factor (*Ctgf*) in small intestine and colon and cyclin e1  
313 (*Ccne1*) in small intestine (Fig. 8c). Due to tight-junction loss and apoptosis caused by  
314 TCS, we examined the actions of lactational TCS exposure on neonatal IEC-specific  
315 *gp130<sup>Act</sup>* mice which show enhanced intestinal barrier repair and upregulation of TJP and  
316 claudins<sup>10</sup>. Q-RT-PCR analysis showed that *gp130<sup>Act</sup>* mice were resistant to TCS-  
317 induced *Fasn*, *Scd1*, *Acaca*, *Acly* and *Mlxipl* mRNAs, all of which play important roles in  
318 DNL (Fig. 8d). In addition, PPAR $\alpha$  target mRNAs, including *Cyp4a10* and *Fabp1* were  
319 reduced in livers of TCS exposed *gp130<sup>Act</sup>* mice (Fig.8e). Hepatic TG levels in *gp130<sup>Act</sup>*  
320 mice treated were also reduced when compared to WT treated mice (Fig. 8f). In addition,  
321 mRNA levels of *Grp78* were lower in livers of *gp130<sup>Act</sup>* mice when compared to WT  
322 treated with TCS (Fig. 8g). IB analysis showed lower protein levels of ATF4, FASN and  
323 SCD-1 in *gp130<sup>Act</sup>* mice compared with WT mice both treated with TCS (Fig. 8h).  
324 Importantly, ORO staining analysis showed no accumulation of lipid droplets in vehicle  
325 and TCS exposed *gp130<sup>Act</sup>* mice when compared to WT mice exposed to TCS (Fig. 8i).  
326 Clearly, *gp130<sup>Act</sup>* mice are resistant to the early actions of lactational TCS delivery on the  
327 development of FL, clearly demonstrating that TCS impacts intestinal barrier integrity.  
328

329

## DISCUSSION

330 TCS, a ubiquitous environmental toxicant that has been detected in urine, blood,  
331 and breast milk in different regions of the world suggests that the general population is  
332 exposed to TCS<sup>25,44-46</sup>. With considerable evidence that TCS alters biological  
333 responses<sup>21</sup>, several key studies in mice have confirmed that long term exposure has  
334 detrimental effects on both the intestinal tract and liver. Chronic exposure to TCS has  
335 been shown to increase colonic inflammation and colitis-associated colon  
336 tumorigenesis<sup>47</sup>, which has recently been linked to reactivation of TCS from its  
337 glucuronide metabolite by specific intestinal microbial  $\beta$ -glucuronidase enzymes<sup>48</sup>. Our  
338 previous studies have shown TCS can function as a liver tumor promoter stimulating liver  
339 tumorigenesis, due in part to induction of oxidative stress and fibrosis<sup>21,22</sup>. In both a  
340 normal chow diet and high fat diet (HFD), TCS increased lipid droplet accumulation in  
341 liver<sup>23</sup>. As an adaptive response to HFD and nutrient sensing, the liver-secreted cytokine  
342 FGF21 is significantly induced. However, an HFD+TCS greatly blunts expression of  
343 FGF21<sup>23</sup>, leading us to hypothesize that FGF21 plays an important role in suppressing  
344 FL. When we induced a type-1 diabetic animal model by treating newborn mice with  
345 streptozotocin to damage insulin-secreting beta cells in the pancreas<sup>49</sup> followed by a  
346 HFD, adult mice robustly developed NASH that was significantly accelerated in the  
347 presence of TCS<sup>23</sup>. TCS-treated mice exhibited elevated levels of oxidative stress,  
348 hepatic fibrosis, and inflammatory responses. With current epidemiological studies  
349 convincingly showing the accumulation of TCS in human breast milk, if it is transferred  
350 to nursing newborns the dietary conditions would simulate an early dietary based HFD  
351 contaminated with TCS. Thus, we developed an animal model that allowed us to  
352 examine the impact of lactational TCS delivery to neonates and its potential impact on  
353 FLD.

354 Neonatal mice receiving TCS through lactation exhibit early onset hepatic ER  
355 stress and steatosis, two important events that stimulate progression from NAFLD to

356 NASH<sup>7</sup>. Several mechanisms can lead to the induction of DNL in liver ER stress,  
357 including caspase-2 activation<sup>50</sup>, inflammation<sup>10</sup>, interleukin-17A<sup>51</sup> and the PERK-eIF2 $\alpha$ -  
358 ATF4 axis<sup>52</sup>. Our findings indicate that ATF4 and PPAR $\alpha$  are critical mediators of this  
359 process. Ablation of ATF4 or blockage with PERK siRNA prevents DNL related gene  
360 induction in neonatal mice receiving TCS through lactation. Interestingly, deletion of  
361 PPAR $\alpha$  also prevented lipid accumulation in the liver. We had previously shown that  
362 PPAR $\alpha$  is activated by TCS through an indirect mechanism, as TCS had no effect on  
363 PPAR $\alpha$  in vitro<sup>22</sup>. Similar outcomes regarding gene expression, TG accumulation and  
364 protein expression in both ATF4 and PPAR $\alpha$  deficient mice suggest that activation of  
365 PPAR $\alpha$  depends on ER stress through the PERK-eIF2 $\alpha$ -ATF4 pathway.

366 Due to the role PPAR $\alpha$  has on FAO, this nuclear receptor has been extensively  
367 studied as a potential target to treat NAFLD<sup>53</sup>. However, we have shown that PPAR $\alpha$   
368 ablation is protective in TCS-induced FLD. Furthermore, *Fgf21*, which is a PPAR $\alpha$  target  
369 gene and plays an important role in fat oxidation<sup>53</sup> is downregulated by TCS treatment,  
370 unlike what is seen in HFD fed mice<sup>23</sup>. Polychlorinated biphenyls (PCBs) have been  
371 shown to also reduce hepatic *Fgf21* mRNA<sup>19</sup>. Since TCS and other environmental  
372 toxicants can reduce FGF21 expression, NAFLD caused by environmental toxicants can  
373 be more aggressive than the development of NAFLD caused by HFD. However, the  
374 exact mechanism by which TCS downregulates FGF21 remains obscure.

375 OCA has been tested as a treatment option for several liver diseases including  
376 NAFLD and type-2 diabetes<sup>40</sup>. However, there is limited mechanistic understanding of  
377 how OCA acts. Our findings demonstrated that the oral administration of OCA  
378 dramatically reduces ATF4, PPAR $\alpha$  signaling, and several genes associated with DNL  
379 in mice exposed to TCS. In addition, activation of gp130 signaling, using the *gp130<sup>Act</sup>*  
380 mouse model, prevented hepatic DNL and ER stress in TCS exposed mice. It is  
381 understood that gp130 reduces endotoxemia and decreases liver inflammation, thus  
382 decreasing fatty liver progression<sup>10</sup>.

383           In summary, the transmission of TCS through lactation leads to lipogenesis, ER  
384 stress, PPAR $\alpha$  activation and inflammation in neonatal livers. These events are  
385 important for early onset FLD. Mechanistically, both ATF4 and PPAR $\alpha$  have an important  
386 role in DNL and NAFLD progression. The similarity in function between these two  
387 transcription factors suggests they may communicate physically. Further studies are  
388 necessary to elucidate this pathway. Administration of OCA and activation of mucosal-  
389 regenerative gp130 signaling ameliorates TCS induced FLD, decreasing ER stress,  
390 PPAR $\alpha$  signaling and DNL. As a ubiquitous environmental toxicant that has been  
391 detected in tissues from individuals of all ages<sup>21</sup>, TCS may initiate TASH in children. In  
392 addition, with the increase in pediatric NAFLD and NASH<sup>3,4</sup>, we can suggest that TCS  
393 exposure through lactation heightens the sensitivity toward FLD as children are  
394 continually exposed to high caloric and energy rich foods.  
395



396 **Acknowledgments.** This work was supported by National Institute of Environmental  
397 Health Sciences Grants R21-ES031849 (R.H.T.), P42-ES010337 (R.H.T., M.J. and  
398 M.K.), R21-AI35677 (S.C.), and a Seed grant to R.H.T. made available through the UC  
399 San Diego Larsson-Rosenquist Foundation Mother-Milk-Infant Center of Research  
400 Excellence (MOMI CORE). The support of the Family Larsson-Rosenquist Foundation  
401 is gratefully acknowledged.”

402

#### 403 **Author contributions**

404 Andre A. Weber. (Conceptualization, Data curation, Data analysis, Writing)

405 Xiaojing Yang (Data curation)

406 Elvira Mennillo (Data curation)

407 Jeffrey Ding (Data curation)

408 Jeramie D. Watrous (Data curation)

409 Mohit Jain (Conceptualization, Data analysis, Resources, Funding)

410 Michael Karin (Conceptualization, Resources, Writing)

411 Shujuan Chen (Data analysis, Resources)

412 Robert H. Tukey (Lead, Funding, Supervision, Writing)

413

414

## FIGURE LEGENDS

415 **Figure 1. Triclosan exposure induces ER stress, stimulates DNL and causes TG**  
416 **accumulation.** WT mice breastfed with TCS or vehicle for 14 or 21 days. **a.** TCS was  
417 measured in milk from stomach contents of 14-day old mice (n=4-6 per group) and serum  
418 at 21 days (n=4 per group). **b.** Expression of hepatic ER stress genes (n=5 per group)  
419 and immunoblot (IB) analysis of total and phosphorylated eIF2 $\alpha$  and ATF4 in liver lysate  
420 from 21-day old mice (n=3 mice per group). **c.** Expression of hepatic lipogenic genes at  
421 21 days (n=6 mice per group) and IB analysis of FASN in livers (n=3 mice per group). **d.**  
422 Measurement of ALT in serum at 21-days-old (n=3-5 per group) **e.** Measurement of  
423 serum palmitate (%), serum and liver triglycerides (TG) at 21 days (n=3-7 mice per  
424 group). **f.** Histology liver sections were stained with H&E and ORO (n=4 per group), Scale  
425 bars=20 $\mu$ m. **a, b, c, d** and **e** show mean  $\pm$  S.E., determined by two-tailed Student's test;  
426 \* $P$ <0.05, \*\* $P$ <0.01, \*\*\* $P$ <0.001.

427

428 **Figure 2. TCS stimulates DNL, ER stress and PPAR $\alpha$  in mouse primary**  
429 **hepatocytes and ATF4 induction is PERK dependent.** Mouse primary hepatocytes  
430 were isolated from one month old mice and were placed in medium with DMSO or in the  
431 presence of 30 $\mu$ M of TCS. After 72 hours of exposure the hepatocytes were collected  
432 for Q-RT-PCR analysis (n=4 samples per group). **a.** TCS stimulates genes associated  
433 with DNL. **b.** Induction of genes associated with ER stress. **c.** downstream PPAR $\alpha$  target  
434 genes. **d.** hepatocytes were isolated, and cells were transfected with mouse PERK  
435 siRNA and control siRNA. Twenty-four hours later, TCS at 30 $\mu$ M was added in the  
436 medium and 48-hours later cells were harvested. Q-RT-PCR analysis of *Perk* after  
437 treatment with siRNA (n=4 samples per group). **e.** Representative IB analysis were  
438 performed for ATF4. **a, b, c,** and **d** show mean  $\pm$  S.E., determined by two-tailed Student's  
439 test; \* $P$ <0.05, \*\* $P$ <0.01, \*\*\* $P$ <0.001.

440

441 **Figure 3. TCS induces genes related to NASH and HCC in liver.** WT mice breastfed  
442 with TCS or vehicle for 21 days. **a.** Heatmaps showing differential expression of genes  
443 related to lipogenesis, retinol metabolism and MCM and HCC in 21-day old mice (n=3  
444 per group). **b.** Expression of genes associated with inflammation, fibrotic and oxidative  
445 stress (n=3 per group). **c.** Representative IB analysis of NQO1, SCD1 and IL-1 $\beta$  at 21  
446 days. **d.** Histological slides were stained with Sirius Red and F4/80 antibody in liver  
447 sections from TCS breastfed (21-day old) or vehicle breast fed WT mice (n=4 per group).  
448 **b** and **d** show mean  $\pm$  S.E., determined by two-tailed Student`s test; \* $P$ <0.05, \*\* $P$ <0.01,  
449 \*\*\* $P$ <0.001. All genes used are significant and p adjusted value below the cut-off level  
450 of 0.05.

451

452 **Figure 4. TCS blocks *Fgf21* expression and AMPK signaling.** WT mice breastfed with  
453 TCS or vehicle for 21 days. **a.** Hepatic expression of *Fgf21* was measured by Q-RT-PCR  
454 and FGF21 serum levels were evaluated by ELISA in 21-day old mice (n=4 per group).  
455 **b.** IB analysis of total and phosphorylated AMPK and expression of AMPK target genes  
456 from TCS and WT mice in liver of 21-day old neonatal mice (n=3 per group). **a** and **b**  
457 show mean  $\pm$  S.E., determined by two-tailed Student`s test; \* $P$ <0.05, \*\* $P$ <0.01.

458

459 **Figure 5. ATF4 controls DNL in liver of TCS treated mice.** *Atf4*<sup>F/F</sup> and *Atf4* <sup>$\Delta$ Hep</sup> mice  
460 breastfed with vehicle or through lactational delivery of TCS for 21 days. **a.** Expression  
461 of hepatic lipogenic genes (n=6 mice per group). **b.** Measurement of liver triglycerides  
462 (TG) (n=4-6 mice per group). **c.** IB analysis of FASN in liver lysate from 21-day old mice.  
463 **d.** Frozen liver sections were stained with ORO (n=3 per group). Scale bars, 20 $\mu$ m. **E.**  
464 Expression of target genes regulated by PPAR $\alpha$  and those that participate in DNL  
465 following PERK siRNA and TCS treatment (n=4 mice per group). **a** through **e** show mean  
466  $\pm$  S.E., determined by two-tailed Student`s test; \* $P$ <0.05, \*\* $P$ <0.01.

467

468 **Figure 6. PPAR $\alpha$  controls DNL in liver of mice exposed to lactational TCS.** WT and  
469 *Ppara*<sup>-/-</sup> neonatal mice breastfed with vehicle or TCS for 21 days. **a.** Expression of  
470 PPAR $\alpha$  target genes at 21 days (n=6 mice per group). **b.** Expression of genes linked to  
471 hepatic lipogenesis (n=4 mice per group). **c.** Hepatic IB analysis of FASN and SCD1. **d.**  
472 Measurement of liver triglycerides (TG) at 21 days (n=4 mice per group). **e.** Frozen liver  
473 sections were stained with ORO (n=3 per group). Scale bar, 20 $\mu$ m. a, b, e, f, g and i  
474 show mean  $\pm$  S.E., determined by two-tailed Student's test; \**P*<0.05, \*\**P*<0.01,  
475 \*\*\**P*<0.001.

476

477 **Figure 7. Orally administration of OCA suppresses DNL genes, PPAR $\alpha$  activity and**  
478 **ER stress in liver of TCS breastfed mice.** Neonatal mice receiving a normal diet or  
479 TCS through lactation for 21 days. During the course of this exposure, 16-day old mice  
480 were treated with OCA for 4 days and tissues collected on day 21. **a.** Expression of  
481 hepatic *Shp*. **b.** Expression of genes associated with lipogenesis. **c.** Hepatic expression  
482 of PPAR $\alpha$  target genes. **d.** Hepatic expression of *Fgf21*. **e.** Measurement of liver TG. **f.**  
483 Genes linked to ER stress. **a-f**, (n=4) per group. **g.** Hepatic IB analysis of ATF4 and  
484 FASN. **h.** Frozen liver sections were stained with ORO (n=3 per group). Scale bar, 20 $\mu$ m.  
485 **a, b, c, d, e,** and **f** show mean  $\pm$  S.E., determined by two-tailed Student's test; \**P*<0.05,  
486 \*\**P*<0.01, \*\*\**P*<0.001.

487

488 **Figure 8. Activation of gp130 suppresses liver DNL, PPAR $\alpha$  activity and ER stress**  
489 **in liver of TCS breastfed mice.** *gp130*<sup>Act</sup> mice received normal milk or TCS through  
490 lactation for 21 days. **a.** IB analysis of cytochrome C, caspase 9, cleaved caspase-3. **b.**  
491 Expression of claudins and IB of claudin-1 in intestines. **c.** Expression of YAP/TAZ target  
492 genes in the intestines. **d.** Expression of hepatic lipogenic genes (n=4 mice per group).  
493 **e.** Expression of hepatic PPAR $\alpha$  target genes. **f.** Measurement of liver TG. **g.** Hepatic  
494 genes linked to ER stress. **b-g** used n=4 mice per group. **h.** Representative IB analysis

495 of ATF4, FASN and SCD1.i, Frozen liver sections were stained with ORO (n=3 per  
496 group). Scale bar, 20 $\mu$ m. b-g and f show mean  $\pm$  S.E., determined by two-tailed  
497 Student`s test; \* $P$ <0.05, \*\* $P$ <0.01, \*\*\* $P$ <0.001.

498

499

## Figures

500 **Figure 1**

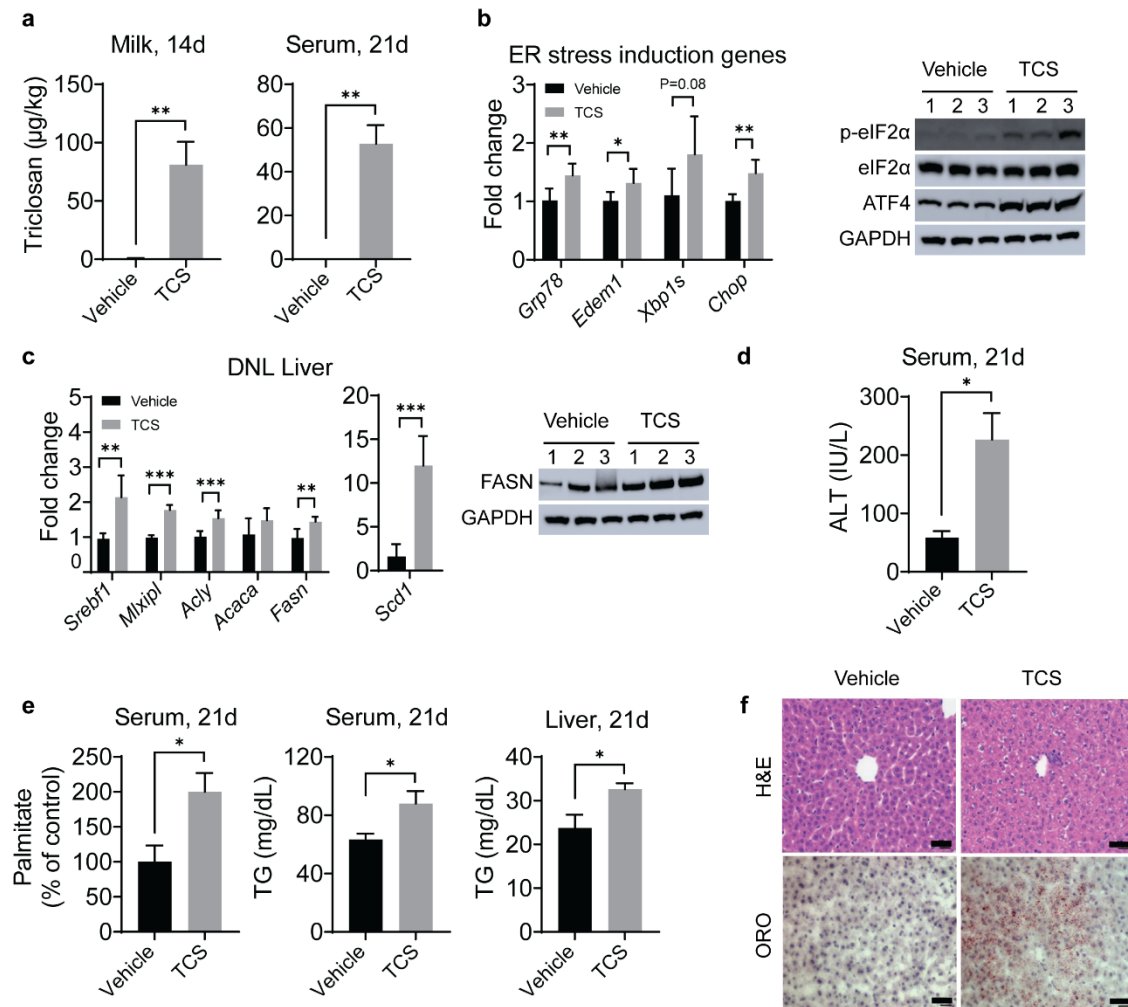

501

502

503

504

505

506

507

508

509

510

511

512 **Figure 2**

513

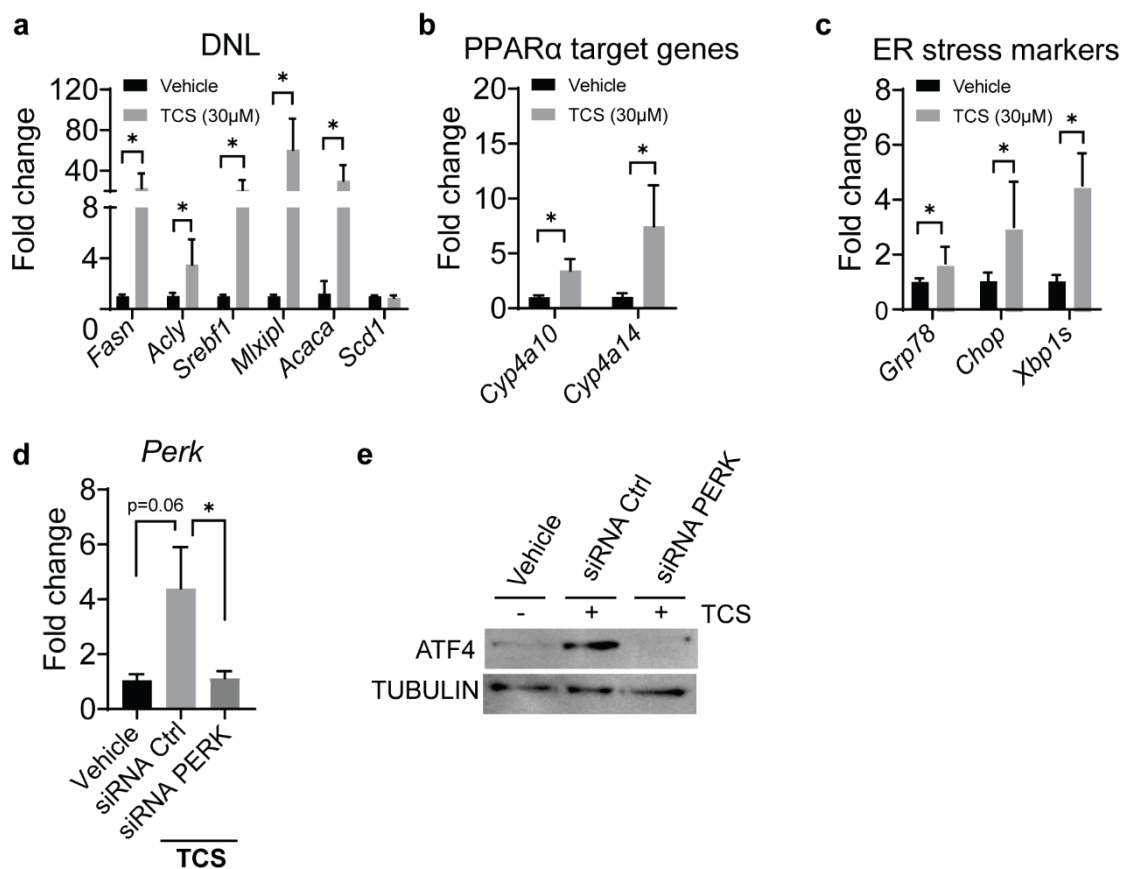

514

515

516 **Figure 3**

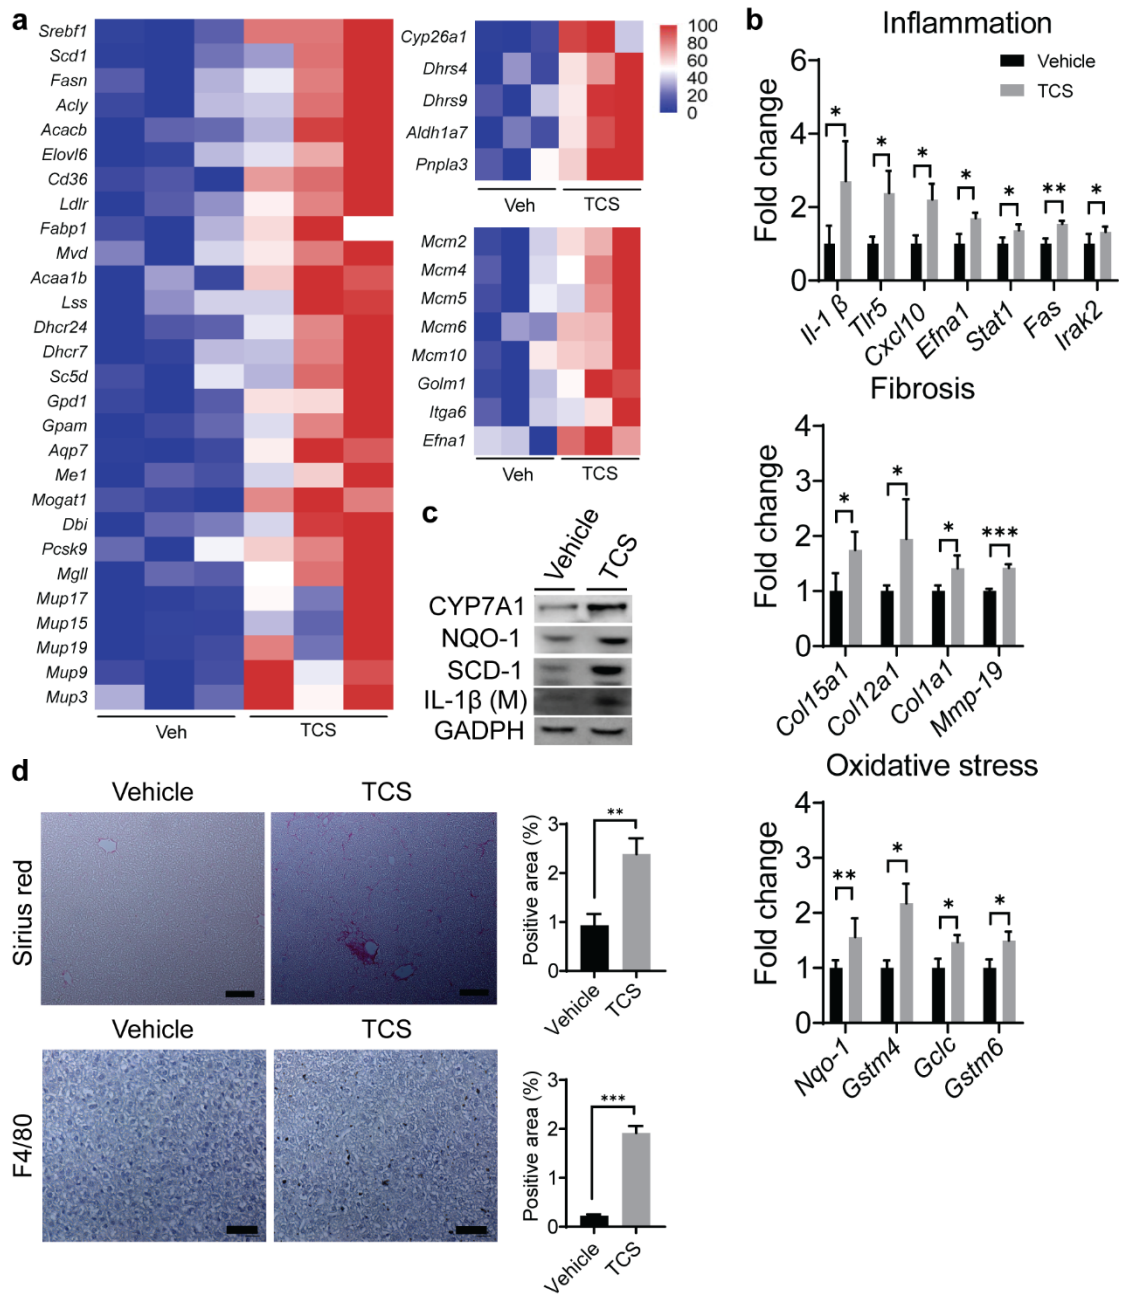

517

518



519 **Figure 4**

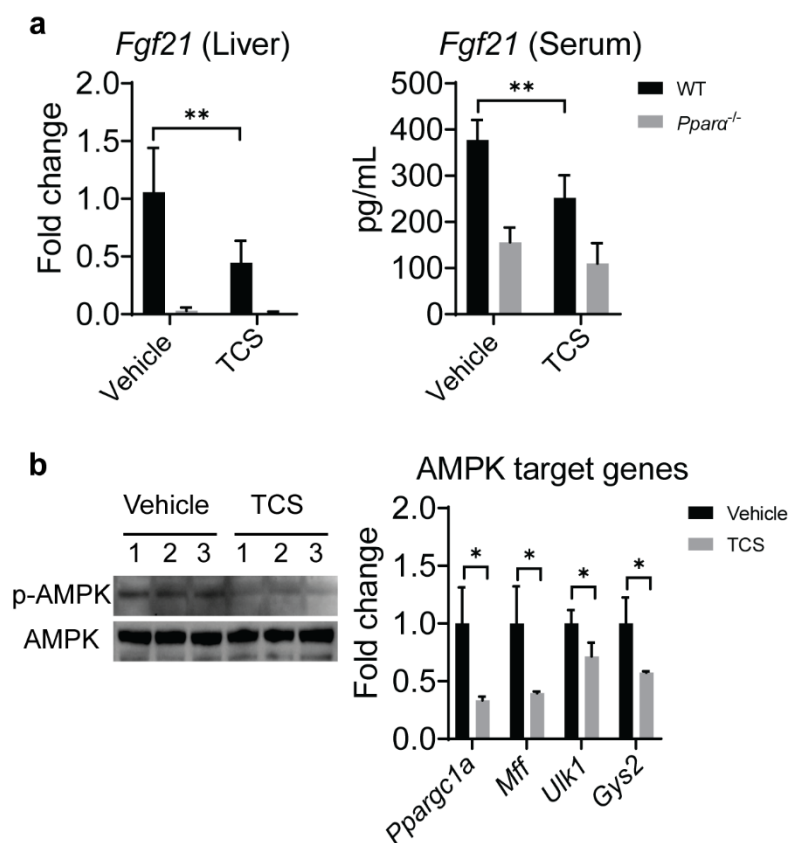

520

521

522 **Figure 5**

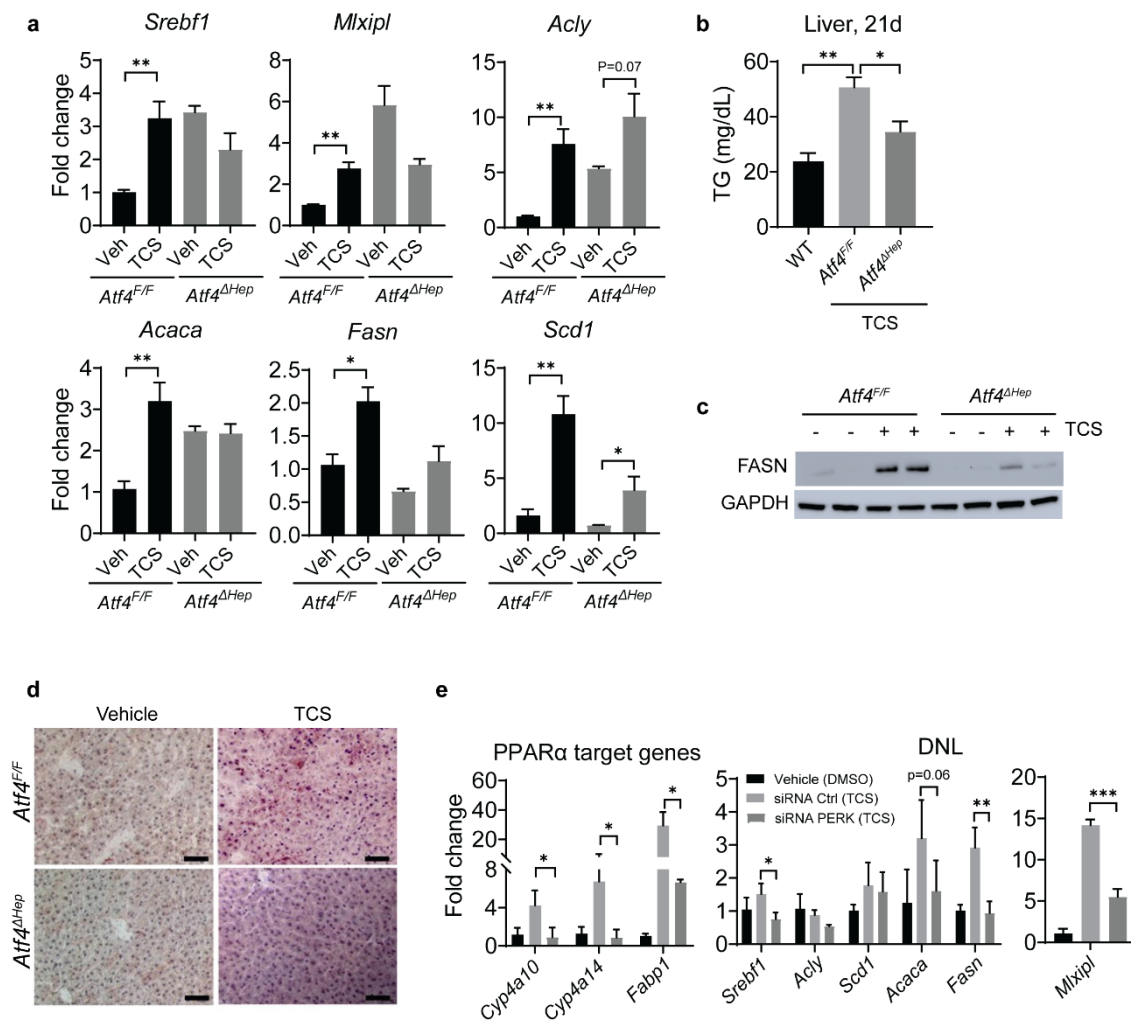

523

524

525 **Figure 6**

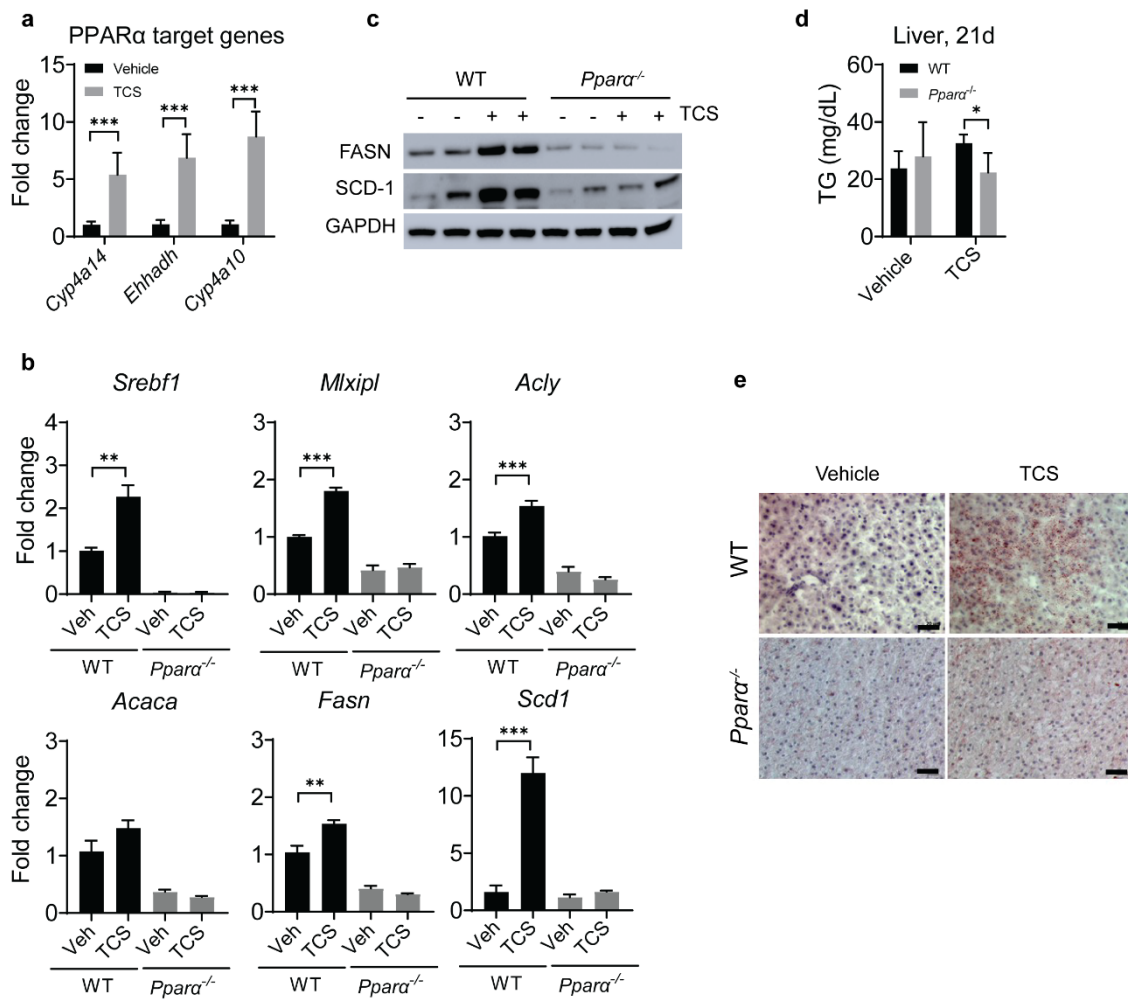

526

527

528 **Figure 7**

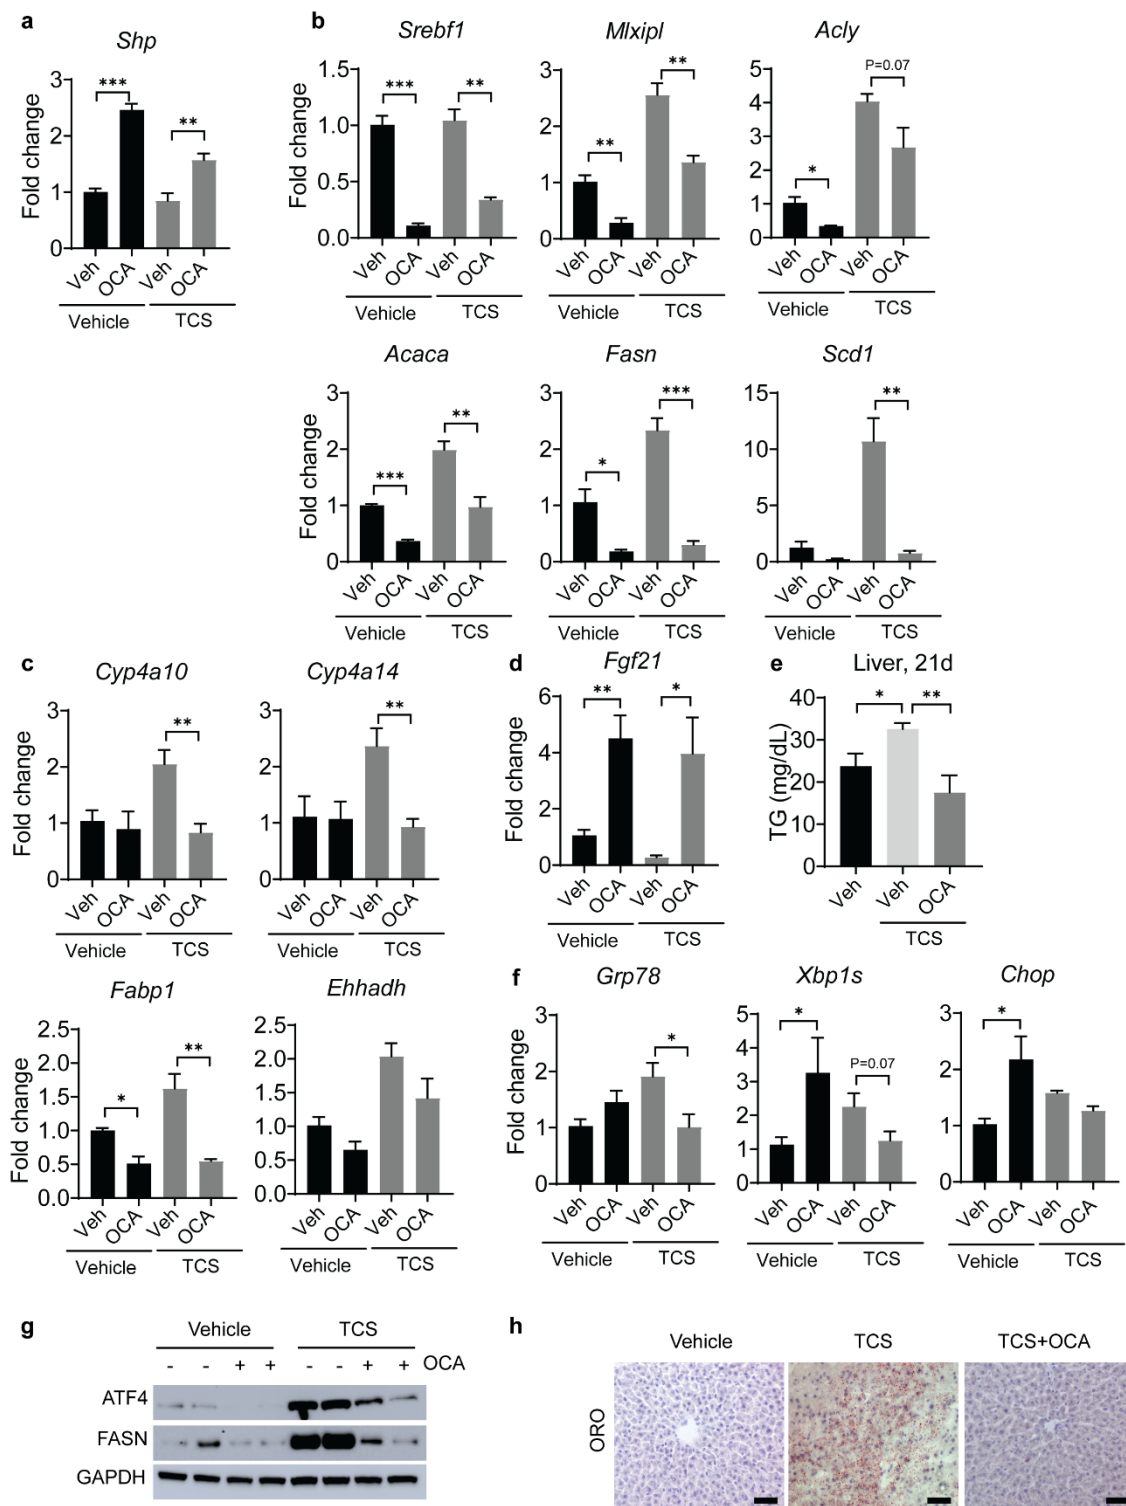

529

530

531 **Figure 8**

532

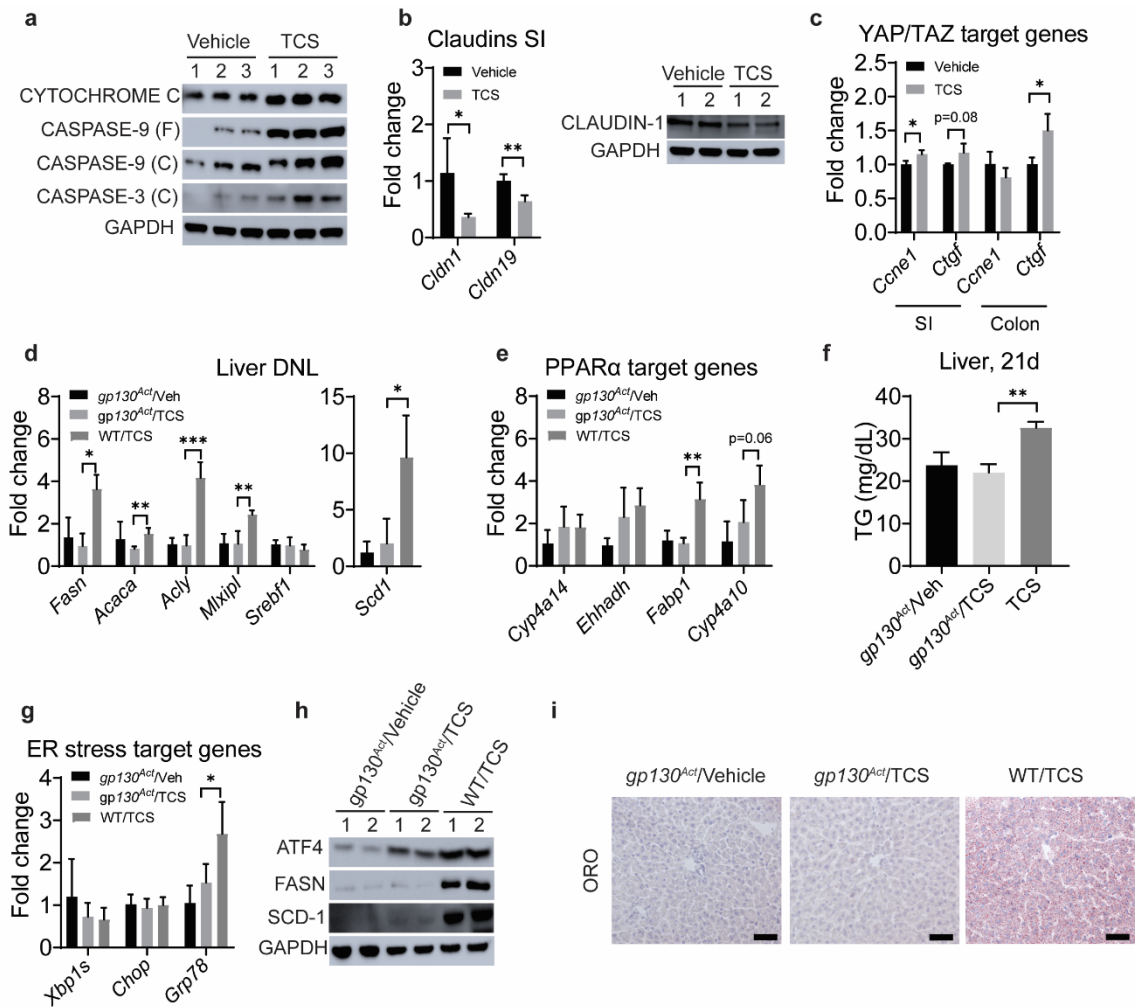

533

534

535 **References**

- 536 1. Spengler, E.K. & Loomba, R. Recommendations for Diagnosis, Referral for Liver  
537 Biopsy, and Treatment of Nonalcoholic Fatty Liver Disease and Nonalcoholic  
538 Steatohepatitis. *Mayo Clin Proc* **90**, 1233-1246 (2015).
- 539 2. Masarone, M., Federico, A., Abenavoli, L., Loguercio, C. & Persico, M. Non  
540 alcoholic fatty liver: epidemiology and natural history. *Rev Recent Clin Trials* **9**,  
541 126-133 (2014).
- 542 3. Kohli, R., *et al.* Pediatric Nonalcoholic Fatty Liver Disease: A Report from the  
543 Expert Committee on Nonalcoholic Fatty Liver Disease (ECON). *J. Pediatr*  
544 (2016).
- 545 4. Goyal, N.P. & Schwimmer, J.B. The Progression and Natural History of Pediatric  
546 Nonalcoholic Fatty Liver Disease. *Clin Liver Dis* **20**, 325-338 (2016).
- 547 5. Schwimmer, J.B., *et al.* Prevalence of fatty liver in children and adolescents.  
548 *Pediatrics* **118**, 1388-1393 (2006).
- 549 6. Alisi, A., Feldstein, A.E., Villani, A., Raponi, M. & Nobili, V. Pediatric nonalcoholic  
550 fatty liver disease: a multidisciplinary approach. *Nat Rev Gastroenterol Hepatol*  
551 **9**, 152-161 (2012).
- 552 7. Tilg, H. & Moschen, A.R. Evolution of inflammation in nonalcoholic fatty liver  
553 disease: The multiple parallel hits hypothesis. *Hepatology* **52**, 1836-1846 (2010).
- 554 8. Lebeaupin, C., *et al.* Endoplasmic reticulum stress signalling and the  
555 pathogenesis of non-alcoholic fatty liver disease. *J Hepatol* **69**, 927-947 (2018).
- 556 9. Rahman, K., *et al.* Loss of Junctional Adhesion Molecule A Promotes Severe  
557 Steatohepatitis in Mice on a Diet High in Saturated Fat, Fructose, and  
558 Cholesterol. *Gastroenterology* **151**, 733-746.e712 (2016).
- 559 10. Todoric, J., *et al.* Fructose stimulated de novo lipogenesis is promoted by  
560 inflammation. *Nat Metab* **2**, 1034-1045 (2020).

- 561 11. Pakos-Zebrucka, K., *et al.* The integrated stress response. *EMBO Rep* **17**, 1374-  
562 1395 (2016).
- 563 12. Evans, R.M. & Mangelsdorf, D.J. Nuclear Receptors, RXR, and the Big Bang.  
564 *Cell* **157**, 255-266 (2014).
- 565 13. Montagner, A., *et al.* Liver PPARalpha is crucial for whole-body fatty acid  
566 homeostasis and is protective against NAFLD. *Gut* **65**, 1202-1214 (2016).
- 567 14. Zhang, X., *et al.* Ablation of cytochrome P450 omega-hydroxylase 4A14 gene  
568 attenuates hepatic steatosis and fibrosis. *Proc Natl Acad Sci U S A* **114**, 3181-  
569 3185 (2017).
- 570 15. Xiao, G., *et al.* ATF4 protein deficiency protects against high fructose-induced  
571 hypertriglyceridemia in mice. *J Biol Chem* **288**, 25350-25361 (2013).
- 572 16. Fisher, F.M. & Maratos-Flier, E. Understanding the Physiology of FGF21. *Annu*  
573 *Rev Physiol* **78**, 223-241 (2016).
- 574 17. Chen, X., *et al.* Hepatic ATF6 Increases Fatty Acid Oxidation to Attenuate Hepatic  
575 Steatosis in Mice Through Peroxisome Proliferator-Activated Receptor  $\alpha$ .  
576 *Diabetes* **65**, 1904-1915 (2016).
- 577 18. Marmugi, A., *et al.* Low doses of bisphenol A induce gene expression related to  
578 lipid synthesis and trigger triglyceride accumulation in adult mouse liver.  
579 *Hepatology* **55**, 395-407 (2012).
- 580 19. Shi, H., *et al.* Polychlorinated biphenyl exposures differentially regulate hepatic  
581 metabolism and pancreatic function: Implications for nonalcoholic steatohepatitis  
582 and diabetes. *Toxicol Appl Pharmacol* **363**, 22-33 (2019).
- 583 20. Halden, R.U. On the need and speed of regulating triclosan and triclocarban in  
584 the United States. *Environ Sci Technol* **48**, 3603-3611 (2014).
- 585 21. Yueh, M.F. & Tukey, R.H. Triclosan: A Widespread Environmental Toxicant with  
586 Many Biological Effects. *Annu. Rev. Pharmacol. Toxicol* **56**, 251-272 (2016).

- 587 22. Yueh, M.F., *et al.* The commonly used antimicrobial additive triclosan is a liver  
588 tumor promoter. *Proc. Natl. Acad. Sci. U. S. A* **111**, 17200-17205 (2014).
- 589 23. Yueh, M.F., *et al.* Triclosan leads to dysregulation of the metabolic regulator  
590 FGF21 exacerbating high fat diet-induced nonalcoholic fatty liver disease. *Proc*  
591 *Natl Acad Sci U S A* (2020).
- 592 24. Toms, L.M., *et al.* Triclosan in individual human milk samples from Australia.  
593 *Chemosphere* **85**, 1682-1686 (2011).
- 594 25. Dayan, A.D. Risk assessment of triclosan [Irgasan] in human breast milk. *Food*  
595 *Chem. Toxicol* **45**, 125-129 (2007).
- 596 26. Rodricks, J.V., Swenberg, J.A., Borzelleca, J.F., Maronpot, R.R. & Shipp, A.M.  
597 Triclosan: a critical review of the experimental data and development of margins  
598 of safety for consumer products. *Crit Rev Toxicol* **40**, 422-484 (2010).
- 599 27. Victora, C.G., *et al.* Breastfeeding in the 21st century: epidemiology,  
600 mechanisms, and lifelong effect. *Lancet* **387**, 475-490 (2016).
- 601 28. Allmyr, M., Adolfsson-Erici, M., McLachlan, M.S. & Sandborgh-Englund, G.  
602 Triclosan in plasma and milk from Swedish nursing mothers and their exposure  
603 via personal care products. *Sci. Total Environ* **372**, 87-93 (2006).
- 604 29. Sandborgh-Englund, G., Adolfsson-Erici, M., Odham, G. & Ekstrand, J.  
605 Pharmacokinetics of triclosan following oral ingestion in humans. *J. Toxicol.*  
606 *Environ. Health A* **69**, 1861-1873 (2006).
- 607 30. Softic, S., *et al.* Divergent effects of glucose and fructose on hepatic lipogenesis  
608 and insulin signaling. *J Clin Invest* **128**, 1199 (2018).
- 609 31. Saeed, A., *et al.* Impaired Hepatic Vitamin A Metabolism in NAFLD Mice Leading  
610 to Vitamin A Accumulation in Hepatocytes. *Cell Mol Gastroenterol Hepatol* **11**,  
611 309-325.e303 (2021).



- 612 32. Liu, Z., *et al.* MCM family in HCC: MCM6 indicates adverse tumor features and  
613 poor outcomes and promotes S/G2 cell cycle progression. *BMC Cancer* **18**, 200  
614 (2018).
- 615 33. Shalpour, S., *et al.* Inflammation-induced IgA+ cells dismantle anti-liver cancer  
616 immunity. *Nature* **551**, 340-345 (2017).
- 617 34. Kuo, T., McQueen, A., Chen, T.C. & Wang, J.C. Regulation of Glucose  
618 Homeostasis by Glucocorticoids. *Advances in experimental medicine and biology*  
619 **872**, 99-126 (2015).
- 620 35. Salminen, A., Kauppinen, A. & Kaarniranta, K. FGF21 activates AMPK signaling:  
621 impact on metabolic regulation and the aging process. *Journal of molecular*  
622 *medicine (Berlin, Germany)* **95**, 123-131 (2017).
- 623 36. Okun, J.G., *et al.* Molecular regulation of urea cycle function by the liver  
624 glucocorticoid receptor. *Molecular metabolism* **4**, 732-740 (2015).
- 625 37. Puigserver, P., *et al.* Insulin-regulated hepatic gluconeogenesis through FOXO1-  
626 PGC-1alpha interaction. *Nature* **423**, 550-555 (2003).
- 627 38. Nakagawa, H., *et al.* ER stress cooperates with hypernutrition to trigger TNF-  
628 dependent spontaneous HCC development. *Cancer Cell* **26**, 331-343 (2014).
- 629 39. Fang, S., *et al.* Intestinal FXR agonism promotes adipose tissue browning and  
630 reduces obesity and insulin resistance. *Nat. Med* **21**, 159-165 (2015).
- 631 40. Mudaliar, S., *et al.* Efficacy and safety of the farnesoid X receptor agonist  
632 obeticholic acid in patients with type 2 diabetes and nonalcoholic fatty liver  
633 disease. *Gastroenterology* **145**, 574-582.e571 (2013).
- 634 41. Piccinin, E., Villani, G. & Moschetta, A. Metabolic aspects in NAFLD, NASH and  
635 hepatocellular carcinoma: the role of PGC1 coactivators. *Nat Rev Gastroenterol*  
636 *Hepatol* **16**, 160-174 (2019).
- 637 42. Wang, K., *et al.* SGK1-dependent intestinal tumor growth in APC-deficient mice.  
638 *Cell Physiol Biochem* **25**, 271-278 (2010).

- 639 43. Low, B.C., *et al.* YAP/TAZ as mechanosensors and mechanotransducers in  
640 regulating organ size and tumor growth. *FEBS Lett* **588**, 2663-2670 (2014).
- 641 44. Calafat, A.M., Ye, X., Wong, L.Y., Reidy, J.A. & Needham, L.L. Urinary  
642 concentrations of triclosan in the U.S. population: 2003-2004. *Environ. Health*  
643 *Perspect* **116**, 303-307 (2008).
- 644 45. Etzel, T.M., *et al.* Urinary triclosan concentrations during pregnancy and birth  
645 outcomes. *Environmental research* **156**, 505-511 (2017).
- 646 46. Arbuckle, T.E., *et al.* Exposure to free and conjugated forms of bisphenol A and  
647 triclosan among pregnant women in the MIREC cohort. *Environ. Health Perspect*  
648 **123**, 277-284 (2015).
- 649 47. Yang, H., *et al.* A common antimicrobial additive increases colonic inflammation  
650 and colitis-associated colon tumorigenesis in mice. *Sci Transl Med* **10**(2018).
- 651 48. Zhang, J., *et al.* Microbial enzymes induce colitis by reactivating triclosan in the  
652 mouse gastrointestinal tract. *Nat Commun* **13**, 136 (2022).
- 653 49. Fujii, M., *et al.* A murine model for non-alcoholic steatohepatitis showing evidence  
654 of association between diabetes and hepatocellular carcinoma. *Med. Mol.*  
655 *Morphol* **46**, 141-152 (2013).
- 656 50. Kim, J.Y., *et al.* ER Stress Drives Lipogenesis and Steatohepatitis via Caspase-  
657 2 Activation of S1P. *Cell* **175**, 133-145.e115 (2018).
- 658 51. Ma, H.Y., *et al.* IL-17 signaling in steatotic hepatocytes and macrophages  
659 promotes hepatocellular carcinoma in alcohol-related liver disease. *J Hepatol* **72**,  
660 946-959 (2020).
- 661 52. Oyadomari, S., Harding, H.P., Zhang, Y., Oyadomari, M. & Ron, D.  
662 Dephosphorylation of Translation Initiation Factor 2 $\alpha$  Enhances Glucose  
663 Tolerance and Attenuates Hepatosteatosi s in Mice. *Cell Metabolism* **7**, 520-532  
664 (2008).

- 665 53. Pawlak, M., Lefebvre, P. & Staels, B. Molecular mechanism of PPAR $\alpha$  action and  
666 its impact on lipid metabolism, inflammation and fibrosis in non-alcoholic fatty  
667 liver disease. *J Hepatol* **62**, 720-733 (2015).
- 668 54. Taniguchi, K., *et al.* A gp130-Src-YAP module links inflammation to epithelial  
669 regeneration. *Nature* **519**, 57-62 (2015).
- 670 55. Lagerborg, K.A., Watrous, J.D., Cheng, S. & Jain, M. High-Throughput Measure  
671 of Bioactive Lipids Using Non-targeted Mass Spectrometry. *Methods Mol Biol*  
672 **1862**, 17-35 (2019).
- 673 56. Watrous, J.D., *et al.* Directed Non-targeted Mass Spectrometry and Chemical  
674 Networking for Discovery of Eicosanoids and Related Oxylipins. *Cell Chem Biol*  
675 **26**, 433-442.e434 (2019).
- 676 57. Brunt, E.M. Nonalcoholic steatohepatitis: pathologic features and differential  
677 diagnosis. *Semin Diagn Pathol* **22**, 330-338 (2005).
- 678 58. Dobin, A., *et al.* STAR: ultrafast universal RNA-seq aligner. *Bioinformatics* **29**,  
679 15-21 (2013).
- 680 59. Bligh, E.G. & Dyer, W.J. A rapid method of total lipid extraction and purification.  
681 *Can J Biochem Physiol* **37**, 911-917 (1959).
- 682
- 683

684

## METHODS

### 685 Mice and treatment options

686 Breeding pairs of C57/B6 and *Ppara*-null (*Ppara*<sup>-/-</sup>) mice were obtained from  
687 Jackson Laboratory (Bar Harbor, ME). ATF4 liver conditional knockout mice (*Atf4*<sup>ΔHep</sup>)  
688 and control (*Atf4*<sup>F/F</sup>) were obtained from Dr. Christopher M. Adams from the University of  
689 Iowa. The intestinal epithelial cell (IEC)-specific expression of the constitutively active  
690 gp130 variant (*gp130*<sup>Act</sup>) mice was produced previously<sup>54</sup>. All animals were housed at  
691 the University of California San Diego (UCSD) Animal Care Facility and received food  
692 and water ad libitum.

693 Due to the tendency for TCS to accumulate in many animals and plants that are  
694 consumed by humans, we administer TCS in the chow <sup>21</sup>. Breeding pairs of all mice  
695 strains (6 weeks old) were fed with a chow diet containing 0.012% TCS (Sigma-Aldrich,  
696 72779) dissolved in vehicle (2ml DMSO + 10ml water) or vehicle alone. The females  
697 received TCS in the chow during pregnancy and lactational period (until neonates  
698 complete 21 days old). Neonatal mice remained with the breeding pairs for 21 days  
699 before being sacrificed, and serum, liver and intestines were collected for analysis.  
700 Treatment with TCS did not affect female body weight. For obeticholic acid (OCA,  
701 MedChemExpress, HY-12222) experiments, C57/BL6 neonates breastfed TCS were  
702 treated with 100 mg/kg of vehicle or OCA (100 mg/kg per day) by oral gavage (p.o.) from  
703 day 16 to day 20. The mice were euthanized when they were 21-days old and tissues  
704 were collected for further analysis. For all experiments we used only male neonatal mice  
705 from at least two independent litters of each treatment group.

706 The protocols for mice handling and procedures were approved by the UCSD  
707 Animal Care and Use Committee (IACUC), and these protocols were conducted in  
708 accordance with federal regulations. Animal Protocol S99100 was approved by the  
709 UCSD Institutional Animal Care and Use Committee.

710

## 711 **Triclosan measurements on milk and serum**

712 We analyzed TCS in the breastmilk of 14-day old neonates. TCS in the serum  
713 was analyzed at 21 days. All solvents used for sample preparation and metabolomic  
714 analysis were LC/MS grade. Methanol, acetonitrile, water, and isopropanol were  
715 purchased from Honeywell International Inc. Ethanol and acetic acid were purchased  
716 from Sigma-Aldrich.

717 All pipetting instruments and consumables were purchased from Eppendorf.  
718 LCMS amber autosampler vials and tri-layer vial caps were purchased from Agilent  
719 Technologies and 300  $\mu$ L glass inserts were purchased from Wheaton. Kinetex C18 1.8  
720 mm (100 x 2.1 mm) UPLC columns were purchased from Phenomenex Inc. UPLC BEH  
721 RP-18 guard columns were purchased from Waters Inc. Pooled human plasma was  
722 obtained from Bioreclamation IVT. Isotopically labeled ( $^{13}\text{C}_{12}$ ) labeled triclosan  
723 standard was purchased from Cambridge Isotopes (P/N CLM-6779-1.2).

724 To each sample, 20  $\mu$ L of serum and milk was transferred to a clean 1.5 mL  
725 microfuge tube. To each sample 80  $\mu$ L of ethanol extraction solvent containing 250 nM  
726 of  $^{13}\text{C}$  labeled triclosan was added. Samples were then vortexed at 2000 rpm for 5  
727 minutes at 4  $^{\circ}\text{C}$  to allow for protein precipitation followed by centrifugation at 14,000 rpm  
728 for 5 minutes at 4  $^{\circ}\text{C}$ . For each sample, 75  $\mu$ L of supernatant was transferred to an amber  
729 glass HPLC vial (P/N 92-5182-0716) containing a Wheaton 300  $\mu$ L (P/N 11-0000-100)  
730 glass insert. Samples were stored at 4  $^{\circ}\text{C}$  in a Thermo Scientific Vanquish UHPLC  
731 autosampler until analysis by LC-MS/MS.

732 LC-MS/MS Data Acquisition was performed as previously described<sup>55,56</sup>. In brief,  
733 20  $\mu$ L of sample was injected onto a Phenomenex Kinetex C18 reverse phase column  
734 and compounds were eluted with a constant flow rate of 0.375 mL/min using the following  
735 gradient: 0-0.25, 99%-99% A, 0.25-5 min, 99%-45% A, 5-5.5 min, 55%-1% A, 5.5-7.5  
736 min, 1%A, where mobile phase A is 70:30:0.1 water: acetonitrile: acetic acid and mobile  
737 phase B is 50:50:0.02 acetonitrile: isopropanol: acetic acid. Compounds were detected

738 using a Thermo Scientific QExactive Orbitrap mass spectrometer equipped with a heated  
739 electrospray ionization (HESI) source operating in negative ion mode with the following  
740 source parameters: sheath gas flow of 40 units, aux gas flow of 15 units, sweep gas flow  
741 of 2 units, spray voltage of -3.5 kV, capillary temperature of 265 °C, aux gas temp of 350  
742 °C, S-lens RF at 45. Data was collected using an MS1 scan event followed by 4 DDA  
743 scan events using an isolation window of 1.0 m/z and a normalized collision energy of  
744 35 arbitrary units. For MS1 scan events, scan range of m/z 225-650, mass resolution of  
745 17.5k, AGC of 1e6 and inject time of 50 ms was used. For tandem MS acquisition, mass  
746 resolution of 17.5 k, AGC 5e5 and inject time of 80 ms was used. TCS was identified by  
747 matching accurate mass, retention time and MS/MS fragmentation pattern with  
748 commercial standard and quantified using the isotopically labeled internal standard. Data  
749 was collected using Thermo Xcalibur software (version 4.1.31.9) and analyzed using  
750 Thermo QualBrowser (version 4.1.31.9) as well as MZmine 2.36.

751

## 752 **Histology and immunohistochemical procedures**

753 To analyze liver and small intestine (jejunum) morphology, tissue samples were  
754 fixed in 10% buffered formalin phosphate (Fisher Chemicals) for analysis at the UCSD  
755 Histology Core. Samples were embedded in paraffin, sliced into 5 µm sections and  
756 stained with H&E (hematoxylin and eosin). A semi-quantitative summary of the  
757 assessment scores for NAFLD histopathology's were performed<sup>57</sup>. For detection of lipid  
758 accumulation, frozen liver samples were embedded in Tissue-Tek optimum cutting  
759 temperature (OCT) compound, frozen at dry ice, stored in -80°C and then sliced to 5 µm  
760 sections and stained with Oil Red O (ORO) and counterstained with hematoxylin as  
761 previously described<sup>6</sup>. For detection of fibrosis, paraffin-embedded sections were stained  
762 with Sirius Red as previously described<sup>22,23</sup>. Representative images were captured on  
763 an upright light/fluorescent microscope (Zeiss) equipped with AxioCam camera.

764 For the staining of F4/80 (ThermoFisher, 41-4801-82) and Ki-67 (GeneTex,  
765 GTX16667), paraffin liver sections were prepared in the Histology Core (University of  
766 California, San Diego). Formalin-fixed, paraffin- embedded liver slides were  
767 deparaffinized and rehydrated, using xylene followed by alcohol and PBS washings.  
768 Antigen retrieval of tissue slides and the immunohistochemical staining with a primary  
769 antibody, secondary biotinylated antibody, and streptavidin-HRP (Pharmingen) were  
770 achieved as described previously<sup>22</sup>. Ki-67-positive cells were counted on five fields of  
771 four different mice of each group of 200x magnification per slide.

772 Detection of apoptotic cells in tissue sections was performed by the TUNEL assay  
773 with the In-Situ Cell Death Detection Kit (TMR red, Roche), according to the protocol  
774 described previously<sup>22</sup>. TUNEL-positive cells were counted on five fields of four different  
775 mice of each group of 200x magnification per slide. The quantification of F4/80 staining  
776 and Sirius Red was performed in Image J software.

777

#### 778 **Reverse Transcription Quantitative-PCR**

779 Tissue samples were homogenized in 1mL TRIzol Reagent (Invitrogen, Waltham, MA)  
780 according to manufacturer's instructions and total RNA was extracted. Using iScript  
781 Reverse Transcriptase (Bio-Rad Laboratories, Hercules, CA), 1 µg of total RNA was  
782 used for the generation of cDNA in a total volume of 12 µL as outlined by the  
783 manufacturer. Following cDNA synthesis, quantitative PCR was carried out on a CFX96  
784 qPCR system (BioRad) by using SsoAdvanced SYBR Green Supermix (BioRad).  
785 Primers sequences are provided in Supplementary Table S2.

786

#### 787 **RNA Sequencing Analysis**

788 For RNA-seq studies, each RNA sample consisted of RNA from 3 mice, and 3  
789 RNA samples (a total of 9 mice) per group were analyzed as previously performed in our  
790 laboratory. The sequencing library was prepared using the Illumina TruSeq RNA Sample

791 Prep Kit (FC-122-1001; Illumina, San Diego, CA) with 1 ug of total RNA. The sequencing  
792 was performed on an NovaSeq 6000 sequencer in the IGM Genomics Center at UCSD.  
793 RNA sequencing data analysis was performed by Dr Kristen Jepsen (UCSD). Image  
794 deconvolution, quality value calculation, and the mapping of exon reads and exon  
795 junctions were performed at the UCSD sequencing core. Base calling was performed  
796 using bcl2fastq (v2.17.1.14; Illumina). RNA sequencing reads were aligned Q20 to the  
797 mice genome (mm10) with STAR (v2.2.0c)<sup>58</sup> with default parameters, only uniquely  
798 alienable reads were used for downstream analysis. Gene expression values were  
799 calculated using HOMER by quantifying strand-specific reads across annotated gene  
800 exons (RefSeq) and reported as fragments per kilobase of exon per million mapped  
801 reads. Sequencing reads were aligned to the *Mus musculus* (UCSC mm10) genome.  
802 Heatmaps were drawn using GraphPad Prism 9.1.0.

803

#### 804 **Western blot analysis**

805 For whole tissue analyses, minced liver tissue (0.1 mg) was homogenized in 0.4  
806 mL 1 X RIPA lysis buffer (EMD Millipore, Billerica, MA) supplemented with protease  
807 inhibitor cocktail (Sigma-Aldrich). After homogenization, the samples were centrifuged at  
808 15,000 x g for 20 min at 4°C and the supernatants transfer to a new tube and kept at -  
809 80°C until analysis.

810 Western blots were performed by using NuPAGE 4–12% BisTris-polyacrylamide  
811 gels (Invitrogen) with the protocols described by the manufacturer. Protein (30 µg) was  
812 electrophoresed at 170 V for 50 min and transferred at 20 V for 2 hours to PVDF  
813 membranes (EMD Millipore). Membranes were blocked with 5% non-fat milk at room  
814 temperature for 1 hour and incubated with primary antibodies (see reagents), at 4 °C  
815 overnight. Membranes were washed and exposed to HRP-conjugated secondary  
816 antibodies (anti-mice IgG, anti-rabbit IgG or anti-rat IgG) for 1 hour at room temperature.  
817 Protein was detected by the ECL Plus Western blotting detection system (BioRad) and



818 was visualized by the BioRad Chemidoc Touch Imaging System. Antibodies used for  
819 Western Blotting were: GAPDH (Santa Cruz, sc-32233),  $\beta$ -catenin (Santa Cruz, sc-  
820 7963), claudin-1 (Santa Cruz, sc-166338), AMPK $\alpha$ 1/2 (Santa Cruz, sc-25792), CYP7A1  
821 (Abcam, ab-65596), SCD1 (Santa Cruz, sc-14720), phospho-AMPK (Cell Signaling,  
822 CS2535), phospho-eIF2 $\alpha$  (Cell Signaling, CS3597), ATF4 (Cell Signaling, CS11815), IL-  
823 1 $\beta$  (Cell Signaling, CS12426), cleaved caspase 3 (Cell Signaling, CS9661), FASN (Cell  
824 Signaling, CS3180), FOXO1 (Cell Signaling, CS2880), NQO-1 (Cell Signaling,  
825 CS62262), cytochrome C (Cell Signaling, CS11940), caspase-9 (Cell Signaling,  
826 CS9508S), phospho- $\beta$ -Catenin (Cell Signaling, CS5651), LGR5 (Abclonal, A10545),  
827 SGK1 (Abclonal, A3936). The secondary antibodies anti-mice IgG horseradish  
828 peroxidase (HRP) conjugated antibody and anti-rabbit IgG HRP conjugated antibodies  
829 were obtained from Cell Signaling Technology, Inc. (Danvers, MA). All primary antibodies  
830 were diluted 1:1,000 and secondary antibodies were diluted 1:3,000.

831

### 832 **Primary hepatocytes culture and PERK-targeted small interfering RNA (*siRNA*)**

#### 833 **Regulation**

834 Primary hepatocytes were isolated from 4-week-old C57/B6 mice. Mice were  
835 anesthetized and the portal vein was cannulated and perfused with Hanks' balanced salt  
836 solution (without Mg<sup>2+</sup> or Ca<sup>2+</sup>) followed by perfusion with Hanks' balanced salt solution  
837 with Mg<sup>2+</sup> and Ca<sup>2+</sup> containing 0.1 mg/mL of Liberase (Roche Applied Science).  
838 Following the removal of the liver, the resulting hepatocytes were filtered through a sterile  
839 70- $\mu$ m filter. The hepatocytes were then cultured in 12-well collagen-treated plates with  
840 Dulbecco's modified Eagle's medium (DMEM) medium containing 10% fetal bovine  
841 serum (FBS) and penicillin/streptomycin for 6 hours. After changing the medium, the  
842 hepatocytes were exposed to TCS at 30  $\mu$ M with DMEM medium supplemented with  
843 25Mm HEPES, 40ng/mL Dexamethasone, 1x Insulin-transferrin-selenium and

844 penicillin/streptomycin. After 72 hours, hepatocytes were collected for Q-RT-PCR and  
845 WB.

846 siRNA specific for mouse PERK (Santa Cruz, sc-36214) and control (Santa Cruz,  
847 sc-37007) were purchased at Santa Cruz Biotechnology. Four hours after primary  
848 hepatocytes were isolated from 4- to 6- week-old C57/B6 mice, cells were transfected in  
849 the presence of 10 nM of either siRNA or control RNA with Lipofectamine RNAiMAX  
850 reagent (Invitrogen) in a final volume of 0.5 mL of OPTI-MEM. After 24 hours medium  
851 was changed with fresh medium supplemented with 25Mm HEPES, 40ng/mL  
852 dexamethasone, 1x insulin-transferrin-selenium and penicillin/streptomycin, containing  
853 TCS or DMSO. Lipofectamine and siRNA were kept until the end of the experiment.  
854 Fourth-eight hours later, cells were used for RNA and protein extraction. Q-RT-PCR were  
855 carried out to examine gene expression levels and WB.

856

#### 857 **Triglyceride and FGF21 ELISA**

858 FGF21 and triglyceride serum levels were measured using FGF-21 Quantikine  
859 enzyme-linked immunosorbent assay kit (R&D System), triglyceride colorimetric assay  
860 kit (Cayman Chemicals), respectively. Lipid contents were extracted by using Bligh and  
861 Dyer method<sup>59</sup> for analysis in liver tissue using the same ELISA kits previously  
862 mentioned.

863

#### 864 **Statistical analyses**

865 Data are represented as mean  $\pm$  SEM. Statistical differences were determined by  
866 Student's t test (two groups) or one-way ANOVA (more than 2 groups). *P* values <0.05  
867 were considered statistically significant, and statistically significant differences are  
868 indicated with \**P*<0.5; \*\**P*<0.01; \*\*\**P*<0.001. Statistical analyses were performed using  
869 GraphPad 9.1.0 (San Diego, CA).

870

871 **Data Availability**

872 The data reported in this paper have been deposited in the Gene Expression Omnibus

873 (GEO) database with the accession code GSE200705.

## SUPPLEMENTARY DATA

### **Lactational delivery of Triclosan promotes non-alcoholic fatty liver disease in newborn mice**

André A. Weber<sup>1</sup>, Xiaojing Yang<sup>1</sup>, Elvira Mennillo<sup>1</sup>, Jeffrey Ding<sup>2</sup>, Jeramie D. Watrous<sup>2</sup>, Mohit Jain<sup>2</sup>, Shujuan Chen<sup>1</sup>, Michael Karin<sup>3</sup> Robert H. Tukey<sup>1,\*</sup>.

Short Title: *Triclosan drives neonatal NAFLD*

<sup>1</sup>Laboratory of Environmental Toxicology, Department of Pharmacology, University of California, San Diego, La Jolla, CA 92093, USA.

<sup>2</sup>Departments of Medicine and Pharmacology, University of California, San Diego, La Jolla, CA 92093, USA.

<sup>3</sup>Laboratory of Gene Regulation and Signal Transduction, Department of Pharmacology, University of California, San Diego, La Jolla, CA 92093.

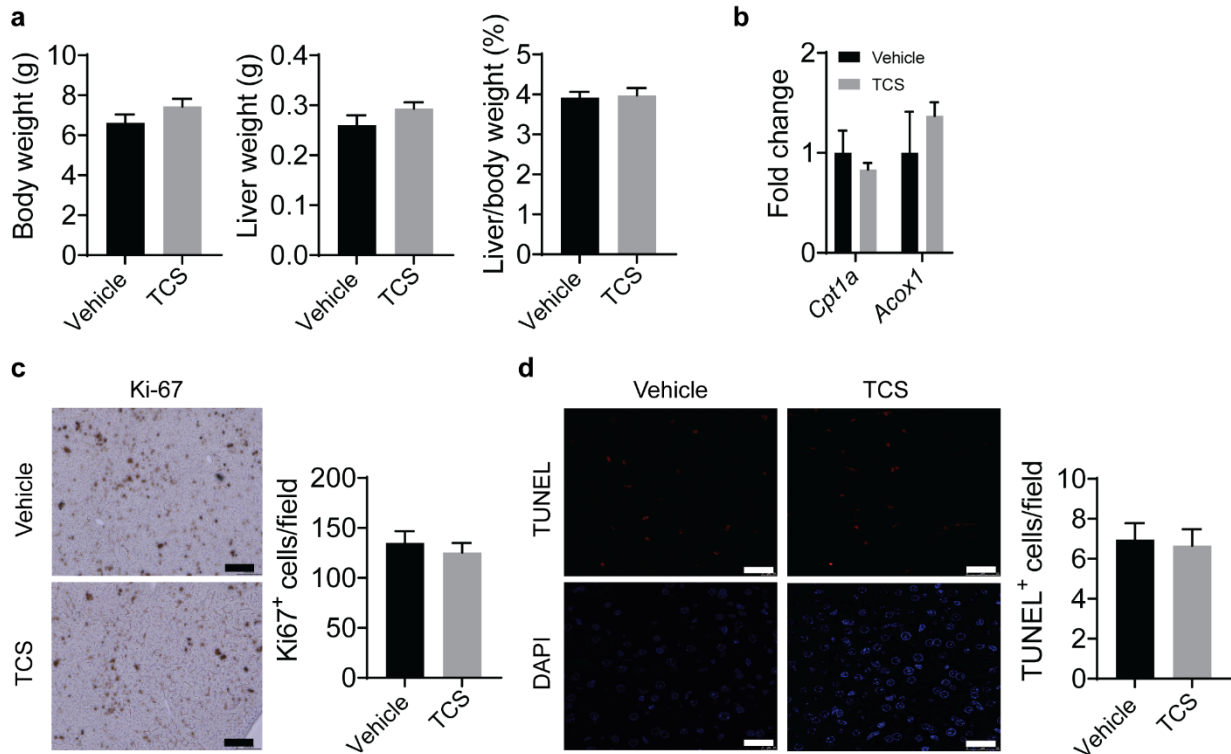

**Figure S1. TCS has no effect on body and liver weight and hepatic proliferation and cell death.** WT mice breastfed with vehicle or TCS for 21-days-old. **a**, Body weight, liver weight and Liver/Body Weight ratio (%) (n=5-6 mice per group). **b**, Expression of genes associated with fatty acid oxidation *Cpt1a* and *Acox1*(n=3 mice per group). **c**, Hepatocyte's proliferation was determined by Ki-67 immunostaining and quantitation of positive cells (n=4 mice per group). **d**, Liver cell apoptosis was determined by TUNEL staining and quantitation of positive cells (n=4 mice per group). a-d show mean  $\pm$  S.E., determined by two-tailed Student's test.

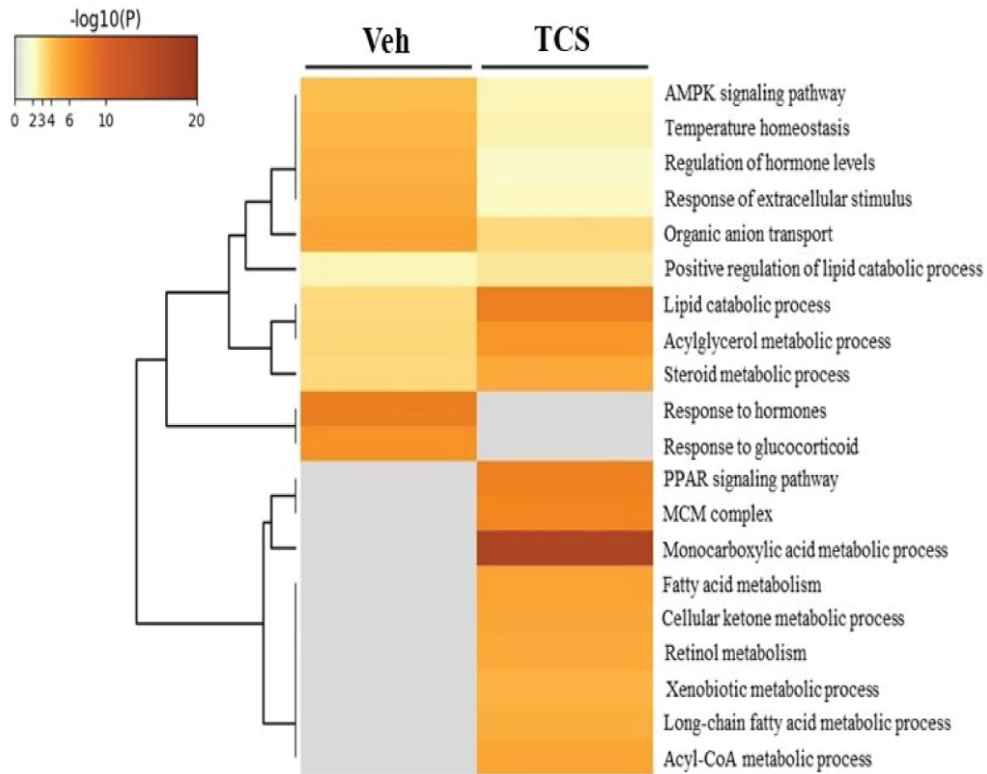

**Figure S2. TCS-induced alterations in the liver transcriptome.** WT mice breastfed with vehicle or TCS for 21-days-old. Heatmap depicting expression of HCC-related genes in liver tissue of neonatal mice treated with vehicle or TCS (n=3 mice per group). All genes showed in this figure had a  $p$ -adjusted value above 0.05, showing no differences between groups.

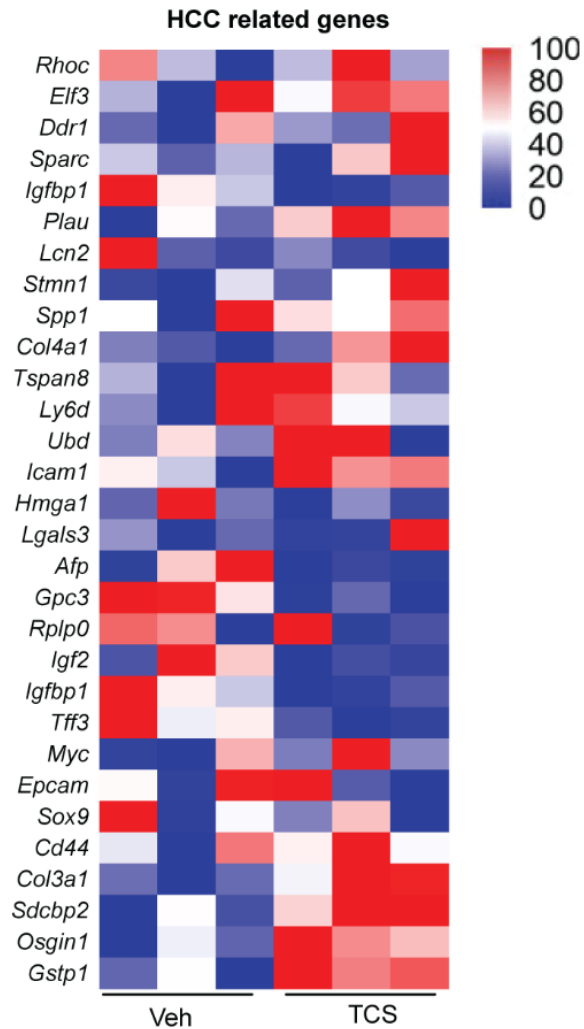

**Figure S3. TCS has little effect on HCC-related genes expression.** WT mice breastfed with vehicle or TCS for 21-days-old. Heatmap depicting expression of HCC-related genes in liver tissue of neonatal mice treated with vehicle or TCS (n=3 mice per group). All genes showed in this figure had a *p*-adjusted value above 0.05, showing no differences between groups.

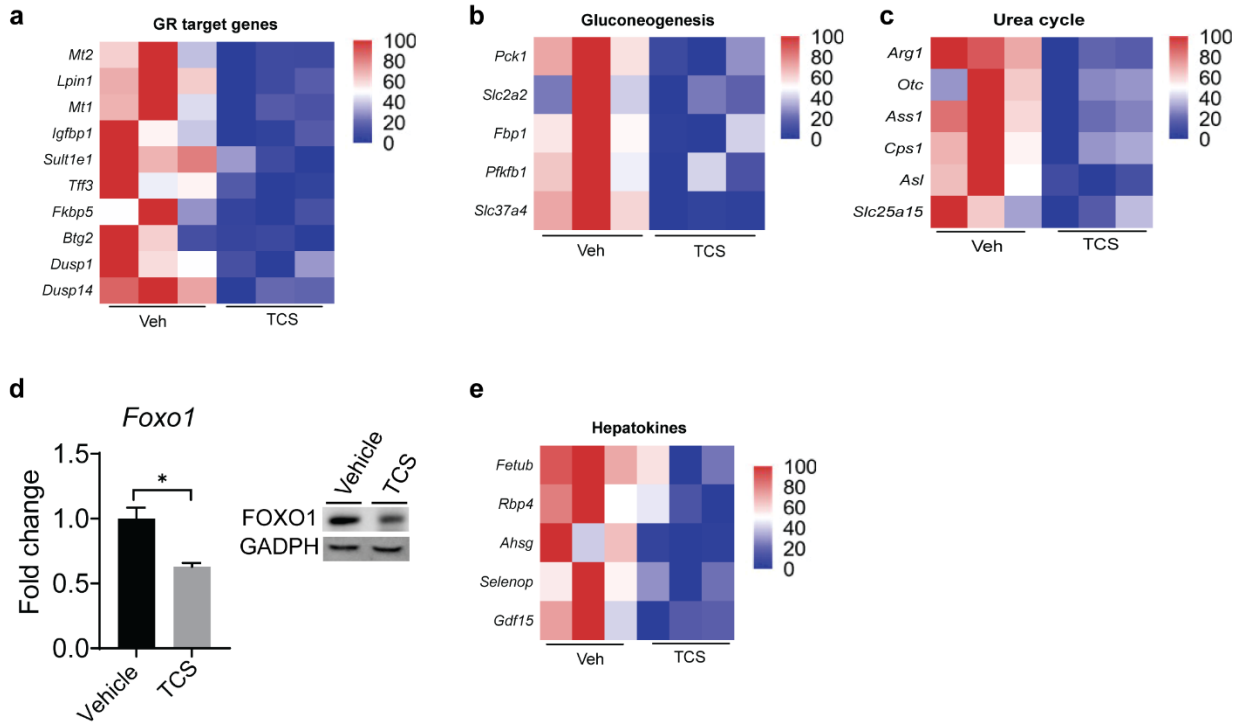

**Figure S4. TCS downregulates glucocorticoid receptor and downstream pathways.** WT mice breastfed with vehicle or TCS for 21-days-old. **a-c** Heatmaps showing differential expression of genes associated with glucocorticoid receptor (GR) signaling (**a**), and genes associated with downstream GR pathways, gluconeogenesis (**b**) and urea cycle (**c**). **d**, gene expression and representative IB image of FOXO1 in liver (n=3 per group). **e**, Heatmap showing differential expression of hepatokines in liver (n=3 per group). **d** show mean  $\pm$  S.E., determined by two-tailed Student's test; \* $P < 0.05$ . All genes used are significant and p adjusted value below the cut-off level of 0.05.



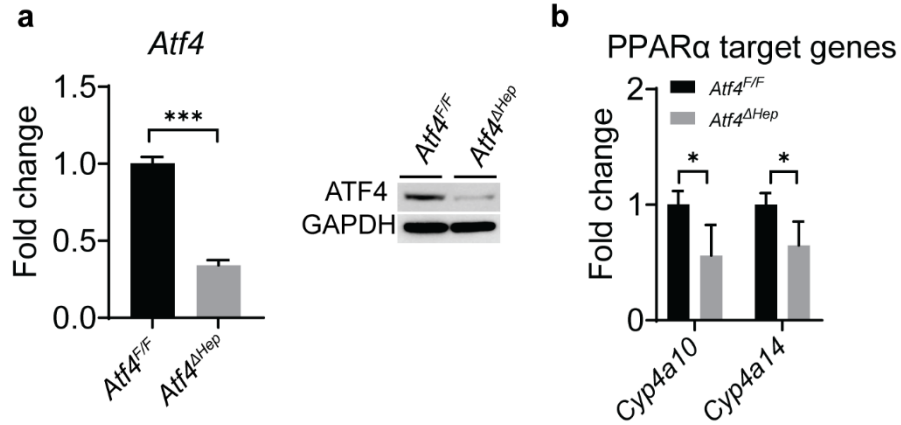

**Figure S5.** Downstream **PPARα** target genes are downregulated in *Atf4<sup>ΔHep</sup>* mice treated with **TCS**. *Atf4<sup>F/F</sup>* and *Atf4<sup>ΔHep</sup>* mice breastfed with TCS milk 21-days-old. **a**, Hepatic expression of ATF4 gene in both *Atf4<sup>F/F</sup>* and *Atf4<sup>ΔHep</sup>* livers and IB of ATF4 (n=6 mice per group). **b**, Hepatic expression of downstream PPARα target genes in *Atf4<sup>F/F</sup>* and *Atf4<sup>ΔHep</sup>* (n=3-5 mice per group). **a**, **b** show mean ± S.E., determined by two-tailed Student's test; \*P<0.05, \*\*\*P<0.001.

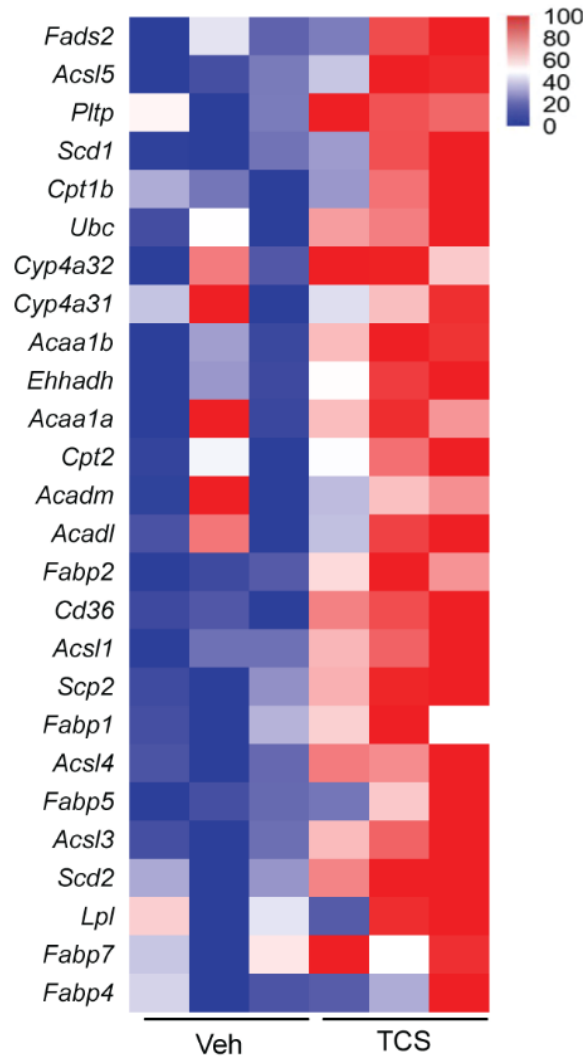

**Figure S6. TCS has strong effect on PPAR $\alpha$  target genes.** WT mice breastfed with vehicle or TCS for 21-days-old. Heatmap depicting expression of downstream PPAR $\alpha$  target genes in liver tissue of neonatal mice treated with vehicle or TCS (n=3 mice per group). All genes showed in this figure had a p-adjusted value above 0.05, showing no differences between groups.

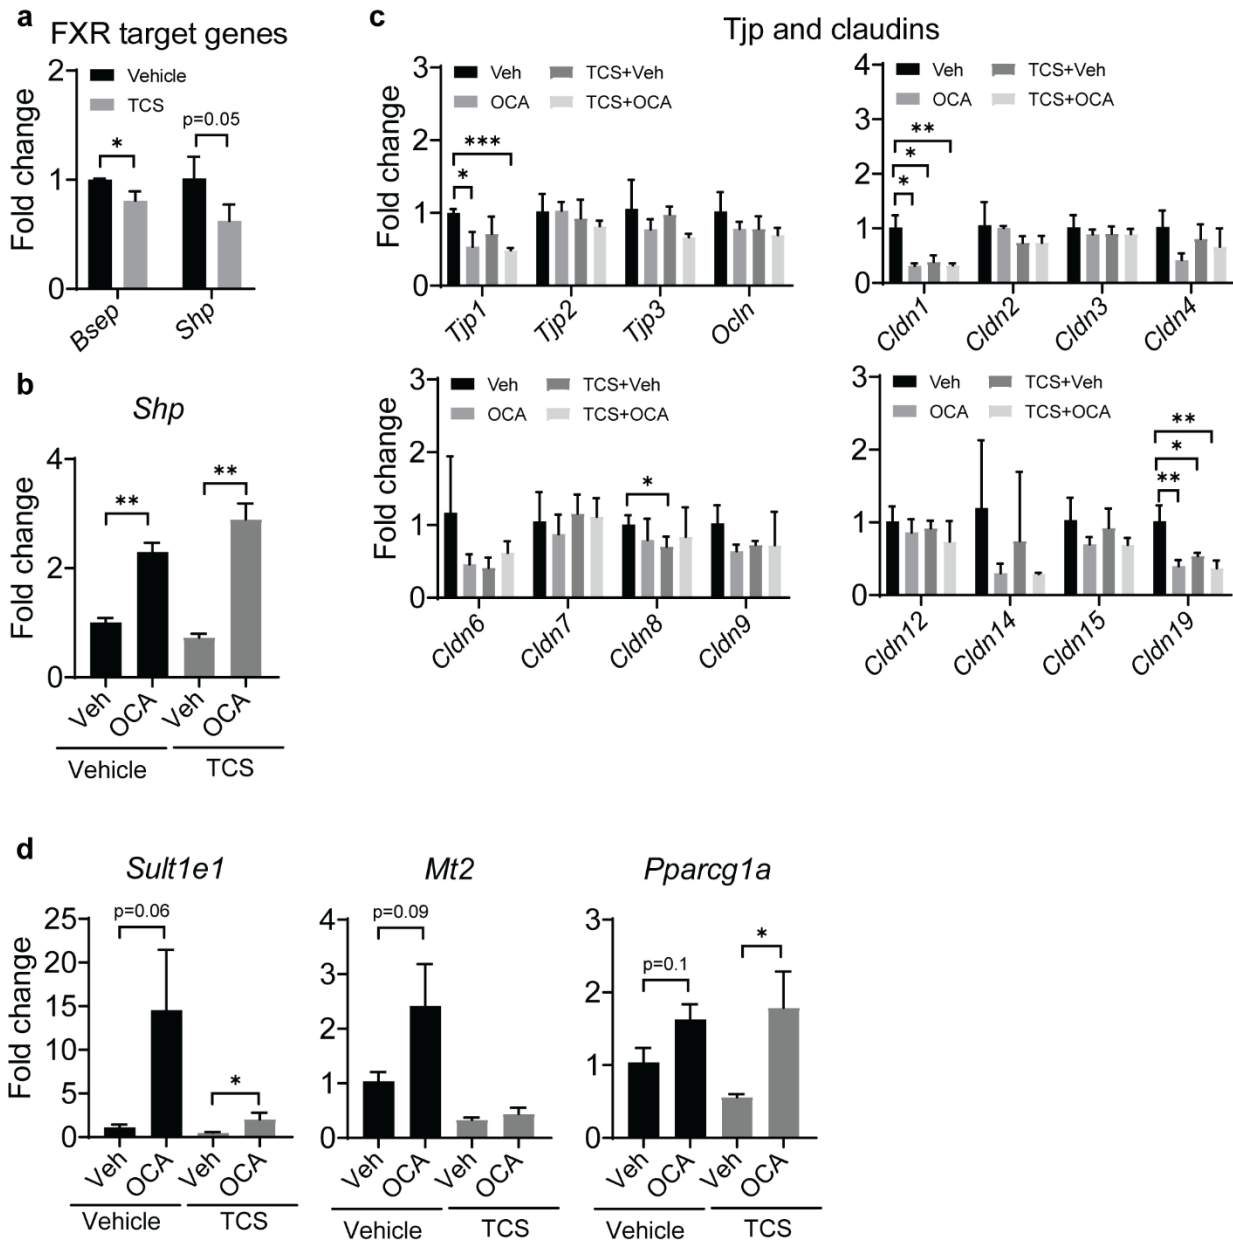

**Figure S7. OCA has no effect in intestinal barrier genes but increases GR response in liver in the absence of TCS.** WT neonatal mice breastfed with vehicle or TCS milk for 21 days and treated with vehicle or OCA. **a**, Hepatic expression of genes associated with FXR (n=3 mice per group). **b**, Intestinal expression of *Shp* (n=3 mice per group). **c**, Intestinal expression of TJPs, occludin and claudins (n=3 mice per group). **d**, Hepatic expression GR related genes (n=4 mice per group). **a-d** show mean  $\pm$  S.E., determined by two-tailed Student's test; \*P<0.05, \*\*P<0.01, \*\*\*P<0.001.

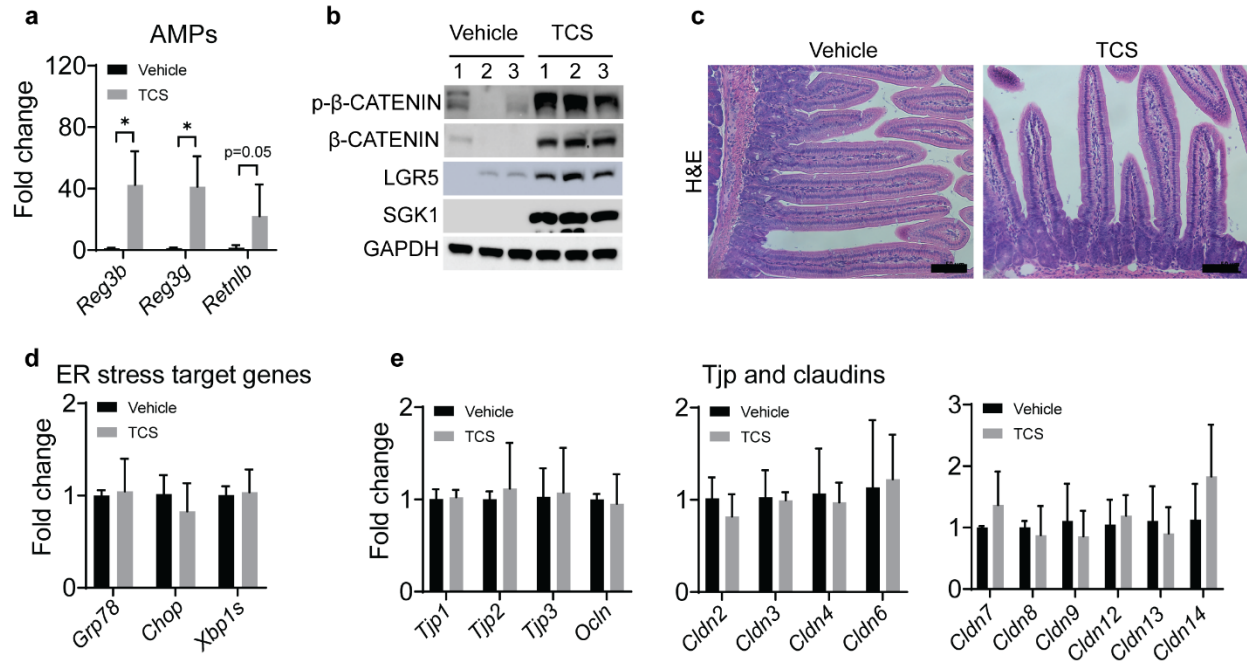

**Figure S8. TCS treatment upregulates AMPs and  $\beta$ -catenin pathway in intestines.** WT neonatal mice breastfed with vehicle or TCS milk for 21 days. **a**, Intestinal expression of *Reg3b*, *Reg3g* and *Retnlb* (n=3-4 mice per group). **b**, Intestinal IB of total and phosphorylated  $\beta$ -catenin and LGR5 and SGK1 (n=3 mice per group). **c**, Jejunum histological sections were stained with H&E (n=3 per group), Scale bars=50 $\mu$ m. **d**, Intestinal expression of genes associated with ER stress (n=3 mice per group). **e**. Intestinal TJP and claudins genes (n=3 mice per group). **a**, **d** and **e** show mean  $\pm$  S.E., determined by two-tailed Student's test; \*P<0.05.

**Table**

**Table S1. NAFLD semi-quantitative score in neonatal mice breastfed with TCS.**

| <b>Histopathology</b> | <b>Vehicle</b> | <b>TCS</b> |
|-----------------------|----------------|------------|
| Steatosis             | 0              | 1          |
| Inflammation          | 0              | 1          |
| Fibrosis              | 0              | 1          |
| Balloning             | 0              | 0          |
| Necrosis              | 0              | 0          |
| <b>Total score</b>    | <b>0</b>       | <b>3</b>   |

**Table S2.** Primer sequences used for Reverse Transcription Quantitative-PCR (RT-qPCR).

| <b>Gene name</b>   | <b>Forward (5' - 3')</b>  | <b>Reverse (5' - 3')</b>  |
|--------------------|---------------------------|---------------------------|
| <i>Acaca</i>       | TTCCACGTAGGAGGAGCTTCC     | CCTCCGGTGCCTTCTCATTAC     |
| <i>Acly</i>        | CTGTGCCACCATGTTCTCCTC     | AGGCCTGGTTCTTGGCTACTG     |
| <i>Atf4</i>        | TTGTCCGTTACAGCAACTG       | GCAGCAGCACCAGGCTCT        |
| <i>Bsep</i>        | AAGGACAGCCACACCAACTC      | CCAGAACATGACAAACGGAA      |
| <i>Ccne1</i>       | TTGCAAGACCCAGATGAAGA      | TCCACGCATGCTGAATTATC      |
| <i>Cldn1</i>       | ATCACCTTCGGGAGCTCAGGT     | TGATGGGGGTCAAGGGGTCAT     |
| <i>Cldn2</i>       | ATGCCTTCTTGAGCCTGCTT      | CAGTGTCTCTGGCAAGCTGA      |
| <i>Cldn3</i>       | CGTACCGTCACCACTACCAG      | CAGCCTAGCAAGCAGACTGT      |
| <i>Cldn4</i>       | CCATGGAACCCTTCCGTTGA      | ACCCGTCCATCCACTCTACA      |
| <i>Cldn6</i>       | CCCTTGGTGGCTGATGCTCAA     | AGGTGGAGCTTGGACTCAGGT     |
| <i>Cldn7</i>       | TGTACCTACCTGGTCCTGGG      | TCTCAGAAAAGACGGGACGC      |
| <i>Cldn8</i>       | GGAATGCCAATCCATCACGC      | CTCTTTTATCCCCAGGCCCC      |
| <i>Cldn9</i>       | AAGTGGTATGGGAGGGGCTGT     | CGCAGGTGGAAGCTTCTGGAA     |
| <i>Cldn12</i>      | TGTGTGCAGATGTGCTCCTGT     | GCAGGAGGGCTTGAGCTGTAT     |
| <i>Cldn14</i>      | CTAACCCAGAGGGCATGTGTGC    | AGTCCCATCCACCTTGATGCT     |
| <i>Cldn15</i>      | GGTGGCTATCTCGTGGTACG      | GCACTCCAGCCCAAGTAGAG      |
| <i>Cldn19</i>      | GGAATTCTTCAACCCAGCAC      | ATAGGGCTGTGGGATGCTGTT     |
| <i>Chop</i>        | CCACCACACCTGAAAGCAGAA     | AGGTGAAAGGCAGGGACTCA      |
| <i>Ctgf</i>        | CAGACTGGAGAAGCAGAGCC      | GCTTGGCGATTTTAGGTGTC      |
| <i>Cyclophilin</i> | CAGACGCCACTGTGCGCTT       | TGTCTTTGGAACCTTTGTCTGC    |
| <i>Cyp4a14</i>     | ACCCCTCTAGATTTGCACCA      | AGCAAACCTGTTTCCCAATGC     |
| <i>Cyp4a10</i>     | CACACCCTGATCACCAACAG      | TCCTTGATGCACATTGTGGT      |
| <i>Edem1</i>       | CTACCTGCGAAGAGGCCG        | GTTTCATGAGCTGCCCACTGA     |
| <i>Ehhadh</i>      | CTATGATCCGCCTCTGCAA       | TGGCTCTAACCGTATGGTCC      |
| <i>Fabp1</i>       | TGCAGAGCCAGGAGAACTTT      | GATTTCTGACACCCCTTGA       |
| <i>Fgf21</i>       | CTCCAGCAGTTCTCTGA         | CCTGGGTGTCAAAGCCTCTA      |
| <i>Fasn</i>        | AGAAGAGCCATGGAGGAGGTG     | ATGTCCACACCACCAATGAGG     |
| <i>Grp78</i>       | TTCAGCCAATTATCAGCAAACCTCT | TTTTCTGATGTATCCTCTTACCAGT |
| <i>Mlxipl</i>      | CGGATACGGACTTGGAGGATC     | GAAGTGTCCGCTGTGGATGAC     |
| <i>Mt2</i>         | TTGCGCTCGACCCAATACTC      | CATTGTTTGCATTTGCAGGCG     |
| <i>Ocln</i>        | TCCGGATCCTGTCTATGCTCA     | ATAGCCACCTCCGTAGCCAAA     |
| <i>Perk</i>        | TCATCCAGCCTTAGCAAACC      | ATGCTTTCACGGTCTTGCTC      |
| <i>Pparcg1a</i>    | AAGTGGTGTAGCGACCAATCG     | AATGAGGGCAATCCGTCTTCA     |
| <i>Reg3b</i>       | CCAAGGGCTCCAGGCTTA        | GAGGTGTCCTCCAGGCCTCT      |

|                |                       |                       |
|----------------|-----------------------|-----------------------|
| <i>Reg3g</i>   | TGGCGCTGAAGCTTCCTTCC  | TCATAGCCCAGTGTCGGGTCA |
| <i>Retnlb</i>  | CCATTTCTGAGCTTTCTGG   | AGCACATCCAGTGACAACCA  |
| <i>Scd1</i>    | GCTCTACACCTGCCTCTTCG  | CAGCCGAGCCTTGTAAGTTC  |
| <i>Shp</i>     | CACGATCCTCTTCAACCCAG  | AGACTTCACACAGTGCCCA   |
| <i>Srebf1</i>  | GGCTCTGGAACAGACACTGG  | TGGTTGTTGATGAGCTGGAG  |
| <i>Sult1e1</i> | AAACTCACCTGCCACCCAAG  | TTGGCGTTCCGGCAAAGATA  |
| <i>Xbp1s</i>   | CTGAGTCCGAATCAGGTGCAG | GTCCATGGGAAGATGTTCTGG |
| <i>Tjp1</i>    | GAAACTCTGCTGAGCCCCCTA | GTTTTAGGGTCACCCGACGAG |
| <i>Tjp2</i>    | CGAAGCAGTCTGGGTCTCTGA | CCGGCTCCTCTAGCTCATTGT |
| <i>Tjp3</i>    | ATGGTATGCCATTTCGGAACC | CCGGGTACAACGTGTCCACTA |
